# Supplementary material
Source: ML conference proceedings conference paper supplement (https://aclanthology.org/2024.humeval-1.25)
Supplement: OptionalSupplementaryMaterial [file Annotation Guideline Reproduction.docx]

Task 1

Evaluate the outputs of the three different systems.

Each row contains a claim, its veracity label and three different explanations/reasons for the veracity label.

Your task is to rank the three different explanations with the ranks 1, 2, 3, (first, second and third place) according to the following criterion:

**Coverage**. The explanation contains important, salient information and doesn't miss any important points that contribute to the fact-check.

You are presented with a column for the criterion.

The *nth* column for each criterion should contain the rank for the *nth* justification.

Example:

For a particular claim, you find that *justification3* was the best w.r.t. coverage, then you put *1 in the third column.*

***Note:***  If there is a tie and two justifications seem to have the **same rank**, then **assign the same rank** to them.

Example:

If you think that justification1 and justification3 were both the best w.r.t. coverage, then the ranks for coverage should be: 1 2 1
