# Supplementary material
Source: ML conference proceedings conference paper supplement (https://aclanthology.org/2024.humeval-1.25)
Supplement: OptionalSupplementaryMaterial [file Annotation Guidelines Original.docx]

Task 1

Evaluate the outputs of the three different systems.

Each row contains a claim, its veracity label and three different explanations/reasons for the veracity label.

Your task is to rank the three different explanations with the ranks 1, 2, 3, (first, second and third place) according to the three following criteria:

1) **Coverage**. The explanation contains important, salient information and doesn't miss any important points that contribute to the fact-check.

2) **Non-redundancy**. The summary does not contain any information that is redundant/repeated/not relevant to the claim and the fact-check.

3) **Non-contradictory.** The summary does not contain any information that is or contradictory to the claim and the fact-check.

4) **Overall**. Rank the explanations by their overall quality.

You are presented with three columns for each of the criteria.

The *nth* column for each criterion should contain the rank for the *nth* justification.

Example:

For a particular claim, you find that *justification3* was the best w.r.t. coverage, then you put *1 in the third column.*

***Note:***  If there is a tie and two justifications seem to have the **same rank**, then **assign the same rank** to them.

Example:

If you think that justification1 and justification3 were both the best w.r.t. coverage, then the ranks for coverage should be: 1 2 1

Task 2

This task consists of providing a veracity label for a claim based on the explanation provided that should entail the label.

Each row consists of the claim, the explanation and you have to provide the veracity label based on the explanation :

- binary: **true, false, insufficient**

- 6-way: **pants-fire, barely-true, half-true, mostly-true, false, true, insufficient**

The label **insufficient** should be used in case the explanation does not provide sufficient information to tell the final label.
