# Supplementary material
Source: ML conference proceedings conference paper supplement (https://aclanthology.org/2024.humeval-1.25)
Supplement: OptionalSupplementaryMaterial [file Annotator1.xlsx]

## Sheet: task 1
6	claim	LABEL	justification 1	justification 2	justification 3	Coverage
2568.json	On implementing a sales tax. Doug Ainge once argued forcefully for a sales tax; now he says ‘No Sales Tax. No Way.’	FALSE	We’re not so sure that an entire opinion piece in the state’s largest newspaper on the merits of a sales tax is cherry-picking, but that’s really neither here nor there. Ainge has gone from arguing for a sales tax (Disneyland doesn’t suffer) to saying he’d vote against one ("No sales tax. No way."). At PolitiFact Oregon, we call that a Full Flop. Comment on this item.	The trip to the Grand Canyon is canceled because of Arizona's sales tax? Are you not taking your children to Disneyland because California has a sales tax? "We must lower the state's marginal income tax rate from 9 percent down to 5-6 percent. Are you going to pass up a Mariners game because of Washington's sales tax?	We must lower the state's marginal income tax rate from 9 percent down to 5-6 percent. food and medicine). The trip to the Grand Canyon is canceled because of Arizona's sales tax? Doug Ainge will fight tax breaks for out-of-state corporations and he’ll vote against a sales tax for Oregon.	1	3	2
11923.json	Says she will work to raise the federal minimum wage back to the highest level its ever been $12 an hour in todays dollars.	half-true	Here we’re checking if Clinton’s proposal to raise the minimum wage to $12 an hour would bring the minimum wage "back to the highest level it’s ever been." In a Feb. 12 Medium post, Clinton wrote, "As president, I will work to raise the federal minimum wage back to the highest level it’s ever been — $12 an hour in today’s dollars — and support state and local efforts to go even further." So Clint…	Clinton said she will "work to raise the federal minimum wage back to the highest level it’s ever been — $12 an hour in today’s dollars." The minimum wage has never previously been "$12 an hour in today’s dollars" -- it’s gone as high as $10.69 an hour. However, Clinton has a point using other economic data. The data suggests that a $12 minimum wage would be similar to the 1968 wage when compared…	In a Feb. 12 Medium post, Clinton wrote, "As president, I will work to raise the federal minimum wage back to the highest level it’s ever been — $12 an hour in today’s dollars — and support state and local efforts to go even further." So Clinton’s $12 minimum wage actually would go beyond restoring, or bringing back, the minimum wage to its highest level ever. Here we’re checking if Clinton’s pro…	2	3	1
11025.json	Six thousand people have sought addiction treatment through expanded Medicaid.	FALSE	It was an honest but unfortunate mistake. We decided to check it out. That was a record, and it led to new laws this legislative session. That’s a remarkable number, given that in the same speech and news accounts, the overall number of those enrolled in the expanded Medicaid program is about 40,000.	Our ruling In her state of the state address, Hassan said that "6,000 people have already accessed services for substance misuse" through the state’s Medicaid program. There is no question that substance abuse in the state is a real and pressing problem, and the statistics show that thousands have sought help as a result of the state’s expanded Medicaid program. But Hassan offered (and later corr…	If so, Hassan would have reported that 9,000 different people received substance abuse treatment. Given Hassan’s numbers, that means about 15 percent had sought treatment for drug or alcohol issues. In 2014, 325 people in the state died from overdoses. That’s a remarkable number, given that in the same speech and news accounts, the overall number of those enrolled in the expanded Medicaid program…	3	1	2
10085.json	All four on Mount Rushmore, they were all independents at one critical point in their career.	FALSE	All four on Mount Rushmore, they were all independents at one critical point in their career, Pressler claimed. Is this one of those cases, or were the four men on Mount Rushmore — George Washington, Thomas Jefferson, Abraham Lincoln and Theodore Roosevelt — each independents at one point in their careers? Thomas Jefferson Jefferson, too, is a bit more complicated because political parties were n…	All four on Mount Rushmore, they were all independents at one critical point in their career, Pressler claimed. But Lincoln never ran as an independent for president or even as a third-party candidate. An independent, in political speak, is a candidate that is not affiliated with a party, just like how Pressler is running. In that sense, it might be fair to say Washington was our only truly indep…	Pressler, an independent, said, "All four on Mount Rushmore, they were independents at one point in their career." It would be an effective campaign pitch, particularly in the home state of the iconic monument, but alas, it’s rubble. Of the four, Washington is probably the one with the most independent bona fides. You can perhaps make the case Jefferson was an independent "at one point" very earl…	3	2	1
9622.json	More women are graduating from college now than men.	TRUE	There are a ton of women CEO’s now running major companies, and more women are graduating from college now than men." But we decided to look at his claim that "more women are graduating from college now than men." "Simply put, young women are now more likely to enroll in, and graduate from, college than young men," Kevin Pollard wrote. However, that trend reversed in the early 1990s, when women b…	There are a ton of women CEO’s now running major companies, and more women are graduating from college now than men." But we decided to look at his claim that "more women are graduating from college now than men." Throughout the 1970s, the chart shows, men graduated from college at higher rates than women did. "We’ve come a long way with pay equity.	McConnell said that "more women are graduating college now than men." We found that since the early 1990s, women have earned more postsecondary degrees than men -- and in the 2011-12 academic year, women earned more degrees of all types -- bachelor’s, master’s and doctoral -- than men did.	1	3	2
7834.json	Nothing in the Constitution explicitly guarantees our right to vote.	TRUE	Words matter, and Pocan’s claim -- that "nothing in the Constitution explicitly guarantees our right to vote" -- is precisely worded. Guarantee the right to vote. -- In a 2012 piece for Salon.com, Yale law professor Heather Gerken wrote: "The Constitution does not guarantee Americans the right to vote. "While the right to vote is inherent throughout our founding document, and there are amendments…	Acknowledging that the right to vote is inherent in the Constitution, Pocan nevertheless called for amending the document and declared: "Nothing in the Constitution explicitly guarantees our right to vote." Whether adding such a guarantee would have much impact is debatable.	Guarantee the right to vote. But he knows we have the right to vote, doesn’t he? In other words, the Supreme Court declared that the Constitution contains no right to vote for president, Alexander Keyssar, professor of history and social policy at Harvard University, told us. Still, is he right?	1	2	3
2205.json	About 106,000 soldiers had a prescription of three weeks or more for pain, depression or anxiety medication.	TRUE	Unannounced health and welfare checks and inspections "have been lost" as part of that transition. "There are instances where a leader’s lack of Soldier accountability resulted in suicide victims not being found until they had been dead for three or four weeks," the report noted. While the report raises a host of issues, we're only ruling on what the general said about the rate of medication amon…	We know that we had over 106,000 soldiers last year who had a prescription of three weeks or more for some kind of antidepressant, anti-anxiety medicine, said Chiarelli. The report explains that historically, the Army's suicide rate has been much lower than the civilian population's. A few moments later, he added, "A portion of those 106,000 soldiers that I told you are on some kind of pain medic…	We know that we had over 106,000 soldiers last year who had a prescription of three weeks or more for some kind of antidepressant, anti-anxiety medicine, said Chiarelli. Another complicating factor: increased use of prescription antidepressants, anti-anxiety drugs and pain medications. The report makes additional observations about prescription drug users in the military. The report explains that…	1	2	2
8606.json	Republicans have proposed dozens of (health care) solutions designed to help control costs and improve quality.	half-true	Throughout the health care debate, Republicans have proposed dozens of solutions designed to help control costs and improve quality — without surrendering control of your personal health care decisions to nameless bureaucrats in Washington, said Sen. Ron Johnson, R-Wis., during the Republican national address Nov. 17. That’s the opposite goal of health care reform. For their part, Republicans hav…	Throughout the health care debate, Republicans have proposed dozens of solutions designed to help control costs and improve quality — without surrendering control of your personal health care decisions to nameless bureaucrats in Washington, said Sen. Ron Johnson, R-Wis., during the Republican national address Nov. 17. The nonpartisan Congressional Budget Office predicted savings of about $12 bill…	Johnson said, "Republicans have proposed dozens of solutions designed to help control costs and improve quality" of health care in the United States.Republicans have circulated quite a few bills and ideas over the years, but there is almost nothing in most of the GOP proposals that directly addresses quality of care. As far as costs, most of the proposals have winners and losers. Some of the bill…	3	1	2
575.json	John McCain intervened, which helped Airbus get that Pentagon contract.	barely-true	The word 'intervening' is not a word I would use, he said. The whole reason there was a competitive bid for a contract to build the tankers is because McCain led a charge to scrap the Air Force's original plan, which was to lease jetliners from Boeing. The contract will now be re-bid. What's interesting about this attack is that McCain's role in this particular defense project has long been seen …	Did it help Airbus get the contract? "He was making sure there was a competition." "Intervening" is a subjective term. Besides, he said, McCain didn't have a vote on who got the contract, so he didn't have the power to steer it to either company.	Some would say two letters arguing against subsidy disputes not being included in the bid competition constitutes intervening. But to imply those letters swung the contract in Airbus' favor overstates McCain's influence.	1	3	2
4425.json	Since the beginning of the year weve created a net increase of 45,000 jobs.	barely-true	Our unemployment has ticked up because we’re not creating as many jobs as we need, but the fact is we are net up in job creation." And among his comments: "Since the beginning of the year we’ve created a net increase of 45,000 jobs. In the interview, Kasich rightly took credit for the budget balancing, adding that the improved credit outlook sends a message that Ohio is a good place to do busines…	There hasn’t been enough time for them to kick in, they say. Standard & Poors cited Ohio’s balanced budget as having a positive impact, but that didn’t happen until the end of June. Ohio has registered job growth since early last year, well before Kasich was elected. And while his efforts have received some positive reviews, there are many factors beyond the governor’s office that impact job grow…	And among his comments: "Since the beginning of the year we’ve created a net increase of 45,000 jobs. Our unemployment has ticked up because we’re not creating as many jobs as we need, but the fact is we are net up in job creation." Two experts we talked to agreed Kasich’s policies are pro-business. In the interview, Kasich rightly took credit for the budget balancing, adding that the improved cr…	2	3	1
2720.json	Says state Senate candidate Monk Elmer voted to exceed the (school district property tax) spending caps.	pants-fire	But that’s what the American Federation for Children did in a direct mail piece sent to residents of the 1st state Senate District, which stretches from the Fox Cities northeast to include the Door County peninsula. Among those receiving it: Elmer himself. But there’s been no evidence that the group has modified the claim. Indeed, Elmer says it has shown up in other pieces of direct mail.	Elmer, president of the Kimberly school board, didn’t recognize the name of the reporter or even the newspaper cited in the footnote: Amy Huddleston, Times-News correspondent. But there’s been no evidence that the group has modified the claim. The group sent out a direct mail piece headlined "Knock Knock, Monk Elmer and Higher Taxes are Calling." Yikes.	1,637 out of 2,000, and 27th of the 32 state schools on the list.) Let’s conclude with an obvious geography lesson: In a key state Senate race, the American Federation for Children reached for a great headline and issue to use against Democratic candidate Monk Elmer.	2	1	2
11083.json	Says Bill and Hillary Clinton attended Donald Trumps last wedding.	TRUE	Curbelo said Bill and Hillary Clinton were at Donald Trump's last wedding. Bill Clinton only made the reception, but Hillary Clinton did have a seat in the first row at the church in 2005. Both rubbed elbows with the stars at the reception.	The short answer is, yes, the Clintons did attend Trump’s 2005 wedding to Melania Knauss. "That’s part of the problem with the system. They were at his last wedding. He has contributed to the Clintons' foundation.	(PunditFact has found to be the case.) The short answer is, yes, the Clintons did attend Trump’s 2005 wedding to Melania Knauss. If I say go to my wedding, they go to my wedding. It was the then-58-year-old Trump’s third wedding.	1	3	2
6900.json	Says shes never said dont build Texas 45 Southwest.	half-true	But has she supported not building it? Were Huber’s actions to pull 45 out of the plan equivalent to saying "Don’t build it"? If the road weren’t in the plan, it wouldn’t be eligible for federal funding. In that capacity, she made an unsuccessful motion later in May 2010 to drop 45 from the plan.	But has she supported not building it? ... If the road weren’t in the plan, it wouldn’t be eligible for federal funding. Huber has taken action against the project both as a commissioner and as a member of the Capital Area Metropolitan Planning Organization.	As far as we can tell, there’s no instance of Huber being so blunt.	1	2	3
7271.json	It costs $10,000 a year to keep a child in school; it costs $30,000 a year to keep someone in prison.	TRUE	It costs $10,000 a year to keep a child in school; it costs $30,000 a year to keep someone in prison, he said. Are we very high on daily costs? The obvious fix, he says, is to lower the daily cost of incarceration. In this PolitiFact, we’re checking Kitzhaber’s math.	Kitzhaber, in his State of the State speech, implored lawmakers to work with him to boost spending for children and families, including more money into classrooms. As part of that initiative, he proposed lowering costs in health care and in prisons, as well as taking a hard look at tax expenditures and public pension reform. He asked lawmakers to keep two numbers in mind: $10,000 to keep a child …	It costs $10,000 a year to keep a child in school; it costs $30,000 a year to keep someone in prison, he said. What we’re trying to say is that both per day breakdowns come from the same source, the state.) (Capital spending per child was $777, but we’re going to stick with the $9,400 figure because the corrections cost does not include capital spending.) Right away, through the magic of the Inte…	3	1	2
1005.json	Obama used $20 million in federal money to emmigrate (sic) Hamas Refugees to the USA.	pants-fire	Nevertheless, the following day, Kyl withdrew the amendment after receiving a letter from the Department of State, which he entered into the Senate record. The letter, from Michael C. Polt, acting assistant secretary of state, states that the $20.3 million drawn from the Emergency Refugee and Migration Assistance Fund (ERMA) "will be used to provide humanitarian assistance to Palestinian refugees…	Then the meat: "Obama funds $20M in tax payer dollars to emmigrate (sic) Hamas Refugees to the USA. And it says the money was used in the Middle East. First, the chain e-mail. Relief and Works Agency supplemented $85 million the U.S. contributed in December 2008 (under President George W. Bush).	Then the meat: "Obama funds $20M in tax payer dollars to emmigrate (sic) Hamas Refugees to the USA. "Of that amount, $25 million supported UNRWA emergency operations in West Bank and Gaza," the release notes. "The remaining $60 million supported UNRWA’s services for 4.6 million Palestinian refugees in the region, including Gaza. And it says the money was used in the Middle East.	2	2	1
4161.json	Active duty males in the military are twice as likely to develop prostate cancer than their civilian counterparts.	mostly-true	However, that same research doesn’t conclude that military members are twice as likely to "develop" prostate cancer as Stearns said. The study hypothesizes that one reason for the different diagnosis rate may be because military members are subject to more frequent health screenings. Getting to the bottom of the discrepancy is actually why Stearns requested the money. That’s a needed clarificatio…	What caught our attention, though, was Stearns’ follow-up assertion: "In addition," he said, "active duty males in the military are twice as likely to develop prostate cancer than their civilian counterparts." These are really top people." Still, Simons cautioned that the potential for drawing a "false correlation" existed -- namely that military members are more likely to get prostate cancer tha…	Twice as likely? Still, Simons cautioned that the potential for drawing a "false correlation" existed -- namely that military members are more likely to get prostate cancer than non-military members. What caught our attention, though, was Stearns’ follow-up assertion: "In addition," he said, "active duty males in the military are twice as likely to develop prostate cancer than their civilian coun…	2	1	1
1873.json	Presidents Hoover, Truman and Eisenhower collectively ordered the deportation of at least 15 million illegal aliens.	FALSE	The official total from 1930 to 1960 is 477,000 formal removals and 5.4 million who left voluntarily. That 30-year period includes the entirety of Roosevelt's terms, not just the three presidents cited in the e-mail.	Experts we spoke to said that it wasn't credible that an even larger number of people could have been deported during that period. Still, the federal government was involved. Beyond that, the e-mail's description of this period is not far off. "What did Hoover, Truman, and Eisenhower have in common?	... Back during The Great Depression, President Herbert Hoover ordered the deportation of ALL illegal aliens in order to make jobs available to American citizens that desperately needed work. • On President Eisenhower: "Operation Wetback" was real, but the numbers of deportations cited in the e-mail are wildly high. And then again in 1954, President Dwight Eisenhower deported 13 million Mexican N…	2	3	1
656.json	There's only four senators senior to me ... there's still 44 older than me.	mostly-true	In all my time in the United States Senate, and I want you to know there's only four senators senior to me, but Barack, there's still 44 older than me, Biden said. It's true that with 35 years, Biden is one of the most senior lawmakers in the Senate, where seniority is based primarily on the length of consecutive Senate service. But Biden's not ranked fifth as he suggests. Rather, he's sixth, jus…	(69), Tom Harkin, D-Iowa (68), Harry Reid, D-Nev. (68), Patrick Leahy, D-Vt. (68), Lamar Alexander, R-Tenn. (68), Barbara Boxer, D-Calif. (67), Ben Nelson, D-Neb. (67), Bernie Sanders, I-Vt. (66), Max Baucus, D-Mont. (66), Mitch McConnell, R-Ky. (66), Joe Lieberman, I-Conn. (66), Jon Kyl, R-Ariz. (66), Byron Dorgan, D-N.D. (66) and Bill Nelson, D-Fla. (66 as of Sept. 29, 2008). But this is all re…	In all my time in the United States Senate, and I want you to know there's only four senators senior to me, but Barack, there's still 44 older than me, Biden said. It's true that with 35 years, Biden is one of the most senior lawmakers in the Senate, where seniority is based primarily on the length of consecutive Senate service. But Biden's not ranked fifth as he suggests. Domenici's 35 years are…	1	3	2
6684.json	This would be the largest casino in the United States.	pants-fire	Especially when they have called a press conference to counter deceptive campaigning by the other side. Her revised statement that the proposed casino would be the second largest in the country isn’t even close to accurate either. That shows a reckless disregard for accuracy.	Technically, this would not be the largest casino in the United States. At the event, campaign spokeswoman Cynara Lilly told reporters that The Grange, as it’s called, would be the largest casino in the United States." It would be the largest in the West." It would be the second largest.	Technically, this would not be the largest casino in the United States. At the event, campaign spokeswoman Cynara Lilly told reporters that The Grange, as it’s called, would be the largest casino in the United States." It would be the second largest. Maybe it would be the largest in Oregon, but we knew enough about mega-casinos to know that sounded overblown.	3	1	2
2149.json	Warren Buffett called (Jeff) Greenes scheme financial weapons of mass destruction.	FALSE	Still, there's no doubt Greene was heavily involved in buying credit default swaps, which are a type of derivative. And Buffett was exceptionally critical of derivatives. The problem with Meek's ad is that it gives the impression that Buffett criticized Greene personally, which he didn't do. By saying Buffett called Greene's scheme a bad idea, Meek personalizes a comment that had nothing to do wi…	Warren Buffett called Greene's scheme 'financial weapons of mass destruction.' We looked at Meek's statement that Greene "is the king of the undercover Credit Default Swap that brought about the destruction of our economy that we have right now." Here, we wanted to check the claim about Warren Buffett, that he "called Greene's scheme 'financial weapons of mass destruction.' (Read our full report.)	Warren Buffett called Greene's scheme 'financial weapons of mass destruction.' We looked at Meek's statement that Greene "is the king of the undercover Credit Default Swap that brought about the destruction of our economy that we have right now." 317 on the Forbes list) would have made it onto Buffett's radar. We should note here that journalists love Buffett's phrase "financial weapons of mass d…	3	1	2
7877.json	Black children constitute 18 percent of the nations public school population but 40 percent of the children who are suspended or expelled.	mostly-true	Black children constitute 18 percent of the nation's public school population but 40 percent of the children who are suspended or expelled, they wrote. Are 40 percent of students suspended or expelled in America’s public schools black? They found although black students made up 18 percent of the nation’s public school population, they accounted for 35 percent of students suspended at least once a…	About 20 percent of the students suspended were Hispanic. Black students made up about 38 percent of expulsions in one category and 42.5 percent of expulsions in another category, the 2006 report showed. Our conclusion: Lewis co-wrote that black students make up 18 percent of the students in America’s public schools but 40 percent of students who are suspended or expelled. The percentage of the U…	Black children constitute 18 percent of the nation's public school population but 40 percent of the children who are suspended or expelled, they wrote. White students were slightly ahead, accounting for 39.1 percent of those suspended. Are 40 percent of students suspended or expelled in America’s public schools black? Again, we were focused on whether the statistics used to make the claim were ac…	1	2	1
1061.json	The war spending bill actually spends more money on the International Monetary Fund than on the war.	barely-true	But he's right that there's a potential for the U.S. Treasury, over time, to give the IMF quite a chunk of change as a result of the line of credit.	We wondered if it was possible that a war funding bill would have more money for the IMF than the wars. So as for Westmoreland's claim, he's wrong that the appropriations bill spends more money on the IMF than for the war. Among the Republicans sounding off was Rep. Lynn Westmoreland of Georgia, who wrote this on his party's blog: "We’re getting an alleged war spending bill that actually spends m…	Among the Republicans sounding off was Rep. Lynn Westmoreland of Georgia, who wrote this on his party's blog: "We’re getting an alleged war spending bill that actually spends more money on the International Monetary Fund than on the war," he wrote. We wondered if it was possible that a war funding bill would have more money for the IMF than the wars. Not so fast. The bill does establish a $100 bi…	3	2	1
11639.json	It is already in the law that there is a requirement to screen (refugees) for religion.	mostly-true	It is already in the law that there is a requirement to screen for religion, Bush said Nov. 29, 2015. Still, experts said it is standard practice to ask refugees about their religion, even if they are not specifically escaping religious persecution. But if their fear stems from their political views, then there is no obligation to ask about their religion. We decided to look at whether American o…	Bush said that there is a legal requirement to screen for religion. U.S. immigration law does state that American officials must dig into a person’s religion if their refugee status is based on a fear of religious persecution. In practice, questions about religion are common even if they are not required. His statement is accurate but needs clarification.	It is already in the law that there is a requirement to screen for religion, Bush said Nov. 29, 2015. According to the department’s press office, the resettlement centers routinely ask about religion. Frelick said religious affiliation is a typical but optional question for refugees. Still, experts said it is standard practice to ask refugees about their religion, even if they are not specificall…	3	2	1
7838.json	Says the word Dhimmitude is on page 107 of the health care law and means Muslims are specifically exempted from the government mandate to purchase insurance.	pants-fire	It's on page 107 of the health care bill. The health care law has a general exception for religious conscience (see page 128). But that’s not the case either. A chain email claims "dhimmitude" is on page 107 of the health care law, and it means Muslims will be exempt from the health care law.	Muslims are not specifically exempted. And if anyone is exempted, it’s a small number of Christian groups. https://www.sharethefacts.co/share/c1619e80-19f5-4804-a3c6-94a8a875f051	A chain email claims "dhimmitude" is on page 107 of the health care law, and it means Muslims will be exempt from the health care law. Pretty interesting. It's on page 107 of the health care bill. What is "Dhimmitude"?	2	3	1
4400.json	Says Jon Huntsman supports changes in Medicare that would deny guaranteed benefits to 980,000 New Hampshire residents.	half-true	The Medicare program does guarantee a set of benefits, Baker said. For this fact-check, we're going to examine whether Huntsman supports the Republican Medicare plan from U.S. Rep. Paul Ryan and whether it indeed would end "guaranteed benefits" to the 980,000 people. The Huntsman campaign told us that Huntsman considers the Ryan plan a "good step forward." Other analysts also shun the word "guara…	For this fact-check, we're going to examine whether Huntsman supports the Republican Medicare plan from U.S. Rep. Paul Ryan and whether it indeed would end "guaranteed benefits" to the 980,000 people. The Huntsman campaign told us that Huntsman considers the Ryan plan a "good step forward." And as for the 980,000, that is roughly the population of people in New Hampshire under 55, the age group t…	The New Hampshire Democratic Party Chair said Huntsman supports a GOP Medicare plan that would deny guaranteed benefits to 980,000 Granite Staters. He’s right about Huntsman's position and the number of New Hampshire residents that would be affected. But he ignores that there is the possibility that the current benefits could be trimmed and he is exaggerating the facts about the Ryan plan. Many d…	1	2	3
10517.json	Ninety-six percent of failing schools are spending above $8,400, the average annual per student expenditure, and 26 percent spend considerably more than that.	half-true	His statement doesn’t point out that the failing schools are likely spending more money because they are receiving more money as a result of having high concentrations of students from low-income families. It could be argued that the money they receive and spend isn’t working -- afterall, they are failing schools by the state’s current measure of success, the CCRPI index. Or it could be said that…	We wondered if the vast majority of these failing schools are, as the governor said, spending more money per student than the average school. "I would say to them that 96 percent of those (failing schools) pay more than the average of the state of $8,400 per child per year, and about 26 percent of them spend considerably more than the state average," the governor said. We decided to check the gov…	We wondered if the vast majority of these failing schools are, as the governor said, spending more money per student than the average school. "We need flexibility on how we spend our salary dollars to keep the best in the lowest performing schools." "But I don’t know if this is the answer," Jackson said. "I would say to them that 96 percent of those (failing schools) pay more than the average of …	3	1	2
2717.json	Of the more than 1.3 million temporary mortgage modifications, over half have defaulted.	half-true	In the final full week of the U.S. Senate race, how did Rubio fare on his numbers about the mortgage modification program? Rubio said "over 1.3 million temporary work-outs, over half have now defaulted,'' referring to a temporary mortgage modification program.	Over 1.3 million temporary work-outs, over half have now defaulted,'' he said. There have been 500,000 permanent (modifications). Rubio also said that more than half of those 1.3 million had defaulted." Rubio: "The temporary modifications.	Rubio also said that more than half of those 1.3 million had "defaulted." "Over 1.3 million temporary work-outs, over half have now defaulted,'' he said. Of those permanent modifications, the majority survived while almost 29,000 were cancelled. The chart states that 699,924 trials had been cancelled -- so note that is slightly more than half.	2	3	1
814.json	The race will tighten, just because that's what happens at the end of campaigns. They always have.	mostly-true	(Gore briefly polled better than Bush in 2000, but that was for just one out of the last 21 days. Similarly, Carter polled better than Reagan in 1980, but for only three out of the last 21 days.) But we're not in the prediction business, we're in the fact business. And the fact is, 14 out of the last 16 elections have tightened in the final few weeks of the campaign.	I mean, I – we think that the race will tighten, just because that's what happens at the end of campaigns. The 1960 election didn't get any tighter at the end either. Their spreadsheet enabled us to see, for instance, that in 1972, Richard Nixon was polling at 67.8 percent 17 days before the election. So yes, that election did tighten at the end.	"I mean, I – we think that the race will tighten, just because that's what happens at the end of campaigns. The 1960 election didn't get any tighter at the end either. Their spreadsheet enabled us to see, for instance, that in 1972, Richard Nixon was polling at 67.8 percent 17 days before the election. So yes, that election did tighten at the end.	1	2	2
8979.json	Says Tom Cottons vote in Congress to change Medicare will increase out-of-pocket expenses for every senior in Arkansas.	barely-true	It says here Cotton voted in Congress to change Medicare into a voucher system that will increase out-of-pocket expenses for every senior in Arkansas, Courtney said, pointing to her laptop. But Pryor’s ad implies that the voucher system alone would affect costs like this for all seniors, rather than the Affordable Care Act. That’s a far cry from the ad’s claim that a voucher system would increase…	Pryor’s campaign ad said, "Cotton voted in Congress to change Medicare into a voucher system that will increase out-of-pocket expenses for every senior in Arkansas." Cotton did vote for a voucher-like system under two different budget proposals. The research isn’t conclusive, and we can’t predict the future. But even the voucher proposals go out of their way to leave current Medicare beneficiarie…	It says here Cotton voted in Congress to change Medicare into a voucher system that will increase out-of-pocket expenses for every senior in Arkansas, Courtney said, pointing to her laptop. But Pryor’s ad implies that the voucher system alone would affect costs like this for all seniors, rather than the Affordable Care Act. Over years, though, under Ryan’s plan, the age for Medicare eligibility w…	3	1	2
6264.json	Because of the health care act, The people who have health care and like it in this county are not going to be able to keep what they have.	barely-true	Cantor said that because of the health care law, "The people who have health care and like it in this country are not going to be able to keep what they have." His statement suggests that losing the health insurance you like is guaranteed by the law. His office cites the bleakest of nine scenarios in Deloitte studies, under which 42 percent of workers would lose their company insurance. The Canto…	Frankly, the people who have health care in this country and like it will not be able to keep what they have, Cantor said. That could happen if more than 25 percent of large corporations with over than 5,000 employees and more than 50 percent of smaller businesses stopped offering insurance. Deloitte did find that, in a worse case scenario, 65 million workers could lose their employer-based insur…	Frankly, the people who have health care in this country and like it will not be able to keep what they have, Cantor said. Is Cantor right that if you like it your health insurance, you will lose it? Deloitte did find that, in a worse case scenario, 65 million workers could lose their employer-based insurance by the end of the decade because of the health care law. The nonpartisan Congressional B…	3	2	1
6774.json	Bill Nelson voted to confirm Sonia Sotomayor, who signed a Supreme Court opinion saying Americans do not have an individual right to own firearms.	mostly-true	For this fact-check, we wanted to confirm whether Nelson voted for Sotomayor and if she signed an opinion that said "Americans do not have an individual right to own firearms." The second part -- that she signed a Supreme Court opinion saying Americans do not have an individual right to own firearms -- is a little harder to understand (at least, for those of us not trained in legalese). Advocates…	The NRA is correct in saying Nelson voted to confirm Sonia Sotomayor as an associate justice of the Supreme Court. And many experts see the group’s assertion that she signed an opinion "saying Americans do not have an individual right to own firearms" as fair. We heard lots of agreement from experts about this characterization, though two advocates of gun control said it is over-simplified. Gun-c…	For this fact-check, we wanted to confirm whether Nelson voted for Sotomayor and if she signed an opinion that said "Americans do not have an individual right to own firearms." The second part -- that she signed a Supreme Court opinion saying Americans do not have an individual right to own firearms -- is a little harder to understand (at least, for those of us not trained in legalese). One of it…	1	3	2
13324.json	Ford is moving all of their small-car production to Mexico.	mostly-true	Ford is moving all of their small-car production to Mexico. Is it really true that Ford is moving all of their small car production to Mexico"? So Trump is right that the company is moving all small-car production in North America to Mexico. "Companies like Carrier are firing their workers and moving to Mexico," Trump said.	Trump said that "Ford is moving all of their small-car production to Mexico." That’s correct as far as it goes, but framing it that way ignores an important qualifier -- that no U.S. jobs will be lost in the transition. The company says that workers at the Ford plant in question will instead make SUVs and pickups. https://www.sharethefacts.co/share/0f5ed3db-289b-4d1c-a1d6-4c03ac61e82e	Is it really true that "Ford is moving all of their small car production to Mexico"? "Ford is moving all of their small-car production to Mexico. "Companies like Carrier are firing their workers and moving to Mexico," Trump said. The Focus and the C-Max are considered small cars.	1	2	1
2514.json	The federal government can tell General Motors what to charge for its automobiles.	FALSE	Based on that, the government does in fact have a 61 percent stake in GM. "GM repaid the government $6.7 billion," Griffanti said in a statement. "The remaining money was converted to a 61 percent ownership stake in GM plus $2.1 billion worth of preferred stock. However, Zaring said he has watched closely to see whether that has happened and, so far, it hasn't.	Let's begin with some background about the federal government's role in the automaker's management. Does the federal government have that type of influence? A Treasury Department spokesman forwarded us testimony in December from Assistant Secretary Herbert Allison, who said government involvement in the day-to-day management of GM is not its goal. In exchange, the government took a 60 percent con…	It's easy to overstate how overinterventionist the government is being, Zaring said. There's no written language in the GM contract with the federal government that states Uncle Sam has any control over vehicle pricing. The board has not gotten involved in such matters, according to GM and others who have paid attention.	2	1	1
12943.json	Under Hillary Clintons plan illegal immigrants convicted of committing crimes get to stay.	half-true	Instead those were crimes in the immigration statutes." This fact-check will focus on whether Clinton supports allowing illegal immigrants convicted of crimes to stay in the country. Illegal immigrants convicted of committing crimes get to stay," states the ad. Alex Nowrasteh, an immigration expert at the libertarian Cato Institute, said it’s clear that Clinton favors legalization for many undocu…	Illegal immigrants convicted of committing crimes get to stay," states the ad. This fact-check will focus on whether Clinton supports allowing illegal immigrants convicted of crimes to stay in the country. "Looking at Hillary’s statements, it’s clear that Trump’s ad is misleading," he said. Clinton has repeatedly called for focusing deportations on violent criminals.	Trump says "In Hillary Clinton’s America ... illegal immigrants convicted of committing crimes get to stay." The tone of the ad is to scare voters into thinking that Clinton would welcome convicted criminals to remain in the country illegally, and that’s an exaggeration. Clinton has said that she will deport "violent criminals" as well as anyone who threatens our safety. She hasn’t been more spec…	2	1	3
7904.json	Says the success of his economic agenda is supported by the fact we went from unemployment at 9.2 percent when I decided to run for governor four years ago to two points lower.	barely-true	Walker said the success of his agenda is supported by the fact that "we went from unemployment at 9.2 percent when I decided to run for governor four years ago to two points lower." Walker’s numbers are on target if you go back "four years." But he muddies the waters by describing that as when he "decided to run" -- and that skews the picture when it comes to improvement. His decision came at an …	We went from unemployment at 9.2 percent when I decided to run for governor four years ago to two points lower. Walker says the success of his economic agenda is supported by the fact that "we went from unemployment at 9.2 percent when I decided to run for governor four years ago to two points lower." So one-third of the drop compared to four years ago came during Walker’s administration. That le…	We went from unemployment at 9.2 percent when I decided to run for governor four years ago to two points lower. Walker says the success of his economic agenda is supported by the fact that "we went from unemployment at 9.2 percent when I decided to run for governor four years ago to two points lower." But the statement is complicated by other factors, especially the phrase "when I decided to run.…	1	3	2
8576.json	Nearly 20% of our residents are born abroad.	TRUE	Austin is truly an international city. Nearly 20 percent of our residents are born overseas, an Austin city official, Natalie Betts, said in a Nov. 8, 2013, press release about an orientation session in Austin’s International Welcome Program. Only 23 percent of Austin’s foreign-born residents were U.S. citizens, according to the survey. In fact, about one-tenth of all Austinites were born in Mexi…	A City of Austin official said, "Nearly 20 percent of our residents" are born abroad. Such residents made up 19.3 percent of the city’s population in the 2007-11 period covered by a federal survey. Click here for more on the six PolitiFact ratings and how we select facts to check.	Census spokeswoman Virginia Hyer told us by phone that the bureau most recently published results of a survey covering 2010-12, which similarly indicated that about 19 percent of Austinites were born abroad. Nearly 20 percent of our residents are born overseas," an Austin city official, Natalie Betts, said in a Nov. 8, 2013, press release about an orientation session in Austin’s International Wel…	3	1	2
2445.json	Its not true that since hes been the president, executions in Iran have increased by four times.	FALSE	And, while even the human rights groups acknowledge their numbers are imprecise (and likely under-reported), the same method for gathering the data has been used for years. That seems the best way, under the circumstances, to establish a trend.	That is not true at all, Ahmadinejad responded. "They haven't come to Iran." In contrast, Amnesty International recorded at least 388 executions in Iran in 2009 (the U.S. had 52). According to Amnesty International's tally, there were at least 94 people executed in Iran in 2005, including at least eight aged under 18 at the time of the crime.	That is not true at all, Ahmadinejad responded. "Not at all. Not at all." In an interview on ABC's This Week, host Christiane Amanpour asked Iranian president Mahmoud Ahmadinejad if he was aware that "since you've been the President executions in Iran have increased by four times."	3	2	1
2852.json	More than 10 years of free trade has brought a $2 billion per day trade deficit.	mostly-true	After all, he said in a news release, more than 10 years of free trade deals have "brought a $2 billion per day trade deficit and the loss of millions of manufacturing jobs -- jobs that should go to Ohio's skilled workers." But what about Brown’s other point -- that more than 10 years of trade under the North American Free Trade Agreement and trade relations with China has resulted in a trade def…	After all, he said in a news release, more than 10 years of free trade deals have "brought a $2 billion per day trade deficit and the loss of millions of manufacturing jobs -- jobs that should go to Ohio's skilled workers." That would make Brown’s $2 billion-a-day figure somewhat high. But what about Brown’s other point -- that more than 10 years of trade under the North American Free Trade Agree…	Yet even if we were to put those numbers aside and only use the Commerce Department numbers, Brown’s figures were close to the mark before the recession. This year is not the best year to measure the normal effects of trade, and no one can predict the future; perhaps the trade deficit will stabilize at a lower number such as $500 billion a year, or $1.36 billion a day. Perhaps it won’t.	2	1	3
11917.json	North Koreas missiles are not going to have a capability to reach the United States anytime real soon.	TRUE	And by the way, they’re not going to have a capability to reach the United States anytime real soon, but it is inevitable over time they will," McCain said when asked about what the United States should do in response to the launch. We wondered just how close North Korea is to reaching the United States via missile, so we put McCain’s statement through a fact-check. Clapper said North Korea is "c…	And by the way, they’re not going to have a capability to reach the United States anytime real soon, but it is inevitable over time they will," McCain said when asked about what the United States should do in response to the launch. We wondered just how close North Korea is to reaching the United States via missile, so we put McCain’s statement through a fact-check. Clapper said North Korea is "c…	McCain said of North Korea’s missile program, "They’re not going to have a capability to reach the United States anytime real soon, but it is inevitable over time they will." His statement is a bit of a generalization, but he’s right. North Korea may have the missile technology -- and range -- to strike the United States, but it hasn’t been tested. Experts on missile technology agreed with McCain.	2	3	1
7334.json	Says his budget provides the highest state funding level in history for education.	half-true	Scott said his budget "includes $10.7 billion in state funding for Florida K-12 schools, the highest state funding level in history." Floridians hearing this statement might think that means education funding for Florida schools has never been higher. That's not the case. Actually, Scott is referring only to the state government's specific contribution to overall spending. Scott drums up the stat…	He wants the state to spend $18.47 billion for education during the 2013-14 school year. Again, the state’s share of that would be about $10.7 billion. In terms of the state’s actual dollar investment, Scott is right that it would be the highest. One is to look at spending per student.	This total includes $10.7 billion in state funding for Florida K-12 schools, the highest state funding level in history, Scott said in a Jan. 31, 2013, news conference about his 2013-14 budget recommendations. In terms of the state’s actual dollar investment, Scott is right that it would be the highest. What’s in the $1.2 billion increase from last year’s education spending? So if the Legislature…	1	2	3
