# Supplementary material
Source: ML conference proceedings conference paper supplement (https://aclanthology.org/2024.humeval-1.25)
Supplement: OptionalSupplementaryMaterial [file Annotator1.xlsx]

## Sheet: task 1
6	claim	LABEL	justification 1	justification 2	justification 3	Coverage			Non-redundancy			Non-contradictory			Overall
2568.json	On implementing a sales tax. Doug Ainge once argued forcefully for a sales tax; now he says ‘No Sales Tax. No Way.’	FALSE	We’re not so sure that an entire opinion piece in the state’s largest newspaper on the merits of a sales tax is cherry-picking, but that’s really neither here nor there. Ainge has gone from arguing for a sales tax (Disneyland doesn’t suffer) to saying he’d vote against one ("No sales tax. No way."). At PolitiFact Oregon, we call that a Full Flop. Comment on this item.	The trip to the Grand Canyon is canceled because of Arizona's sales tax? Are you not taking your children to Disneyland because California has a sales tax? "We must lower the state's marginal income tax rate from 9 percent down to 5-6 percent. Are you going to pass up a Mariners game because of Washington's sales tax?	We must lower the state's marginal income tax rate from 9 percent down to 5-6 percent. food and medicine). The trip to the Grand Canyon is canceled because of Arizona's sales tax? Doug Ainge will fight tax breaks for out-of-state corporations and he’ll vote against a sales tax for Oregon.	1	2	2	1	2	2	1	2	2	1	2	2
11923.json	Says she will work to raise the federal minimum wage back to the highest level its ever been $12 an hour in todays dollars.	half-true	Here we’re checking if Clinton’s proposal to raise the minimum wage to $12 an hour would bring the minimum wage "back to the highest level it’s ever been." In a Feb. 12 Medium post, Clinton wrote, "As president, I will work to raise the federal minimum wage back to the highest level it’s ever been — $12 an hour in today’s dollars — and support state and local efforts to go even further." So Clint…	Clinton said she will "work to raise the federal minimum wage back to the highest level it’s ever been — $12 an hour in today’s dollars." The minimum wage has never previously been "$12 an hour in today’s dollars" -- it’s gone as high as $10.69 an hour. However, Clinton has a point using other economic data. The data suggests that a $12 minimum wage would be similar to the 1968 wage when compared…	In a Feb. 12 Medium post, Clinton wrote, "As president, I will work to raise the federal minimum wage back to the highest level it’s ever been — $12 an hour in today’s dollars — and support state and local efforts to go even further." So Clinton’s $12 minimum wage actually would go beyond restoring, or bringing back, the minimum wage to its highest level ever. Here we’re checking if Clinton’s pro…	3	2	1	3	1	2	3	1	2	3	1	1
11025.json	Six thousand people have sought addiction treatment through expanded Medicaid.	FALSE	It was an honest but unfortunate mistake. We decided to check it out. That was a record, and it led to new laws this legislative session. That’s a remarkable number, given that in the same speech and news accounts, the overall number of those enrolled in the expanded Medicaid program is about 40,000.	Our ruling In her state of the state address, Hassan said that "6,000 people have already accessed services for substance misuse" through the state’s Medicaid program. There is no question that substance abuse in the state is a real and pressing problem, and the statistics show that thousands have sought help as a result of the state’s expanded Medicaid program. But Hassan offered (and later corr…	If so, Hassan would have reported that 9,000 different people received substance abuse treatment. Given Hassan’s numbers, that means about 15 percent had sought treatment for drug or alcohol issues. In 2014, 325 people in the state died from overdoses. That’s a remarkable number, given that in the same speech and news accounts, the overall number of those enrolled in the expanded Medicaid program…	3	1	2	3	1	2	3	1	2	3	1	2
10085.json	All four on Mount Rushmore, they were all independents at one critical point in their career.	FALSE	All four on Mount Rushmore, they were all independents at one critical point in their career, Pressler claimed. Is this one of those cases, or were the four men on Mount Rushmore — George Washington, Thomas Jefferson, Abraham Lincoln and Theodore Roosevelt — each independents at one point in their careers? Thomas Jefferson Jefferson, too, is a bit more complicated because political parties were n…	All four on Mount Rushmore, they were all independents at one critical point in their career, Pressler claimed. But Lincoln never ran as an independent for president or even as a third-party candidate. An independent, in political speak, is a candidate that is not affiliated with a party, just like how Pressler is running. In that sense, it might be fair to say Washington was our only truly indep…	Pressler, an independent, said, "All four on Mount Rushmore, they were independents at one point in their career." It would be an effective campaign pitch, particularly in the home state of the iconic monument, but alas, it’s rubble. Of the four, Washington is probably the one with the most independent bona fides. You can perhaps make the case Jefferson was an independent "at one point" very earl…	2	3	1	3	2	1	2	1	3	3	2	1
9622.json	More women are graduating from college now than men.	TRUE	There are a ton of women CEO’s now running major companies, and more women are graduating from college now than men." But we decided to look at his claim that "more women are graduating from college now than men." "Simply put, young women are now more likely to enroll in, and graduate from, college than young men," Kevin Pollard wrote. However, that trend reversed in the early 1990s, when women b…	There are a ton of women CEO’s now running major companies, and more women are graduating from college now than men." But we decided to look at his claim that "more women are graduating from college now than men." Throughout the 1970s, the chart shows, men graduated from college at higher rates than women did. "We’ve come a long way with pay equity.	McConnell said that "more women are graduating college now than men." We found that since the early 1990s, women have earned more postsecondary degrees than men -- and in the 2011-12 academic year, women earned more degrees of all types -- bachelor’s, master’s and doctoral -- than men did.	1	3	2	2	3	1	2	3	1	2	3	1
7834.json	Nothing in the Constitution explicitly guarantees our right to vote.	TRUE	Words matter, and Pocan’s claim -- that "nothing in the Constitution explicitly guarantees our right to vote" -- is precisely worded. Guarantee the right to vote. -- In a 2012 piece for Salon.com, Yale law professor Heather Gerken wrote: "The Constitution does not guarantee Americans the right to vote. "While the right to vote is inherent throughout our founding document, and there are amendments…	Acknowledging that the right to vote is inherent in the Constitution, Pocan nevertheless called for amending the document and declared: "Nothing in the Constitution explicitly guarantees our right to vote." Whether adding such a guarantee would have much impact is debatable.	Guarantee the right to vote. But he knows we have the right to vote, doesn’t he? In other words, the Supreme Court declared that the Constitution contains no right to vote for president, Alexander Keyssar, professor of history and social policy at Harvard University, told us. Still, is he right?	1	2	3	1	2	3	1	2	3	1	2	3
2205.json	About 106,000 soldiers had a prescription of three weeks or more for pain, depression or anxiety medication.	TRUE	Unannounced health and welfare checks and inspections "have been lost" as part of that transition. "There are instances where a leader’s lack of Soldier accountability resulted in suicide victims not being found until they had been dead for three or four weeks," the report noted. While the report raises a host of issues, we're only ruling on what the general said about the rate of medication amon…	We know that we had over 106,000 soldiers last year who had a prescription of three weeks or more for some kind of antidepressant, anti-anxiety medicine, said Chiarelli. The report explains that historically, the Army's suicide rate has been much lower than the civilian population's. A few moments later, he added, "A portion of those 106,000 soldiers that I told you are on some kind of pain medic…	We know that we had over 106,000 soldiers last year who had a prescription of three weeks or more for some kind of antidepressant, anti-anxiety medicine, said Chiarelli. Another complicating factor: increased use of prescription antidepressants, anti-anxiety drugs and pain medications. The report makes additional observations about prescription drug users in the military. The report explains that…	2	1	3	3	1	2	2	1	3	3	1	2
8606.json	Republicans have proposed dozens of (health care) solutions designed to help control costs and improve quality.	half-true	Throughout the health care debate, Republicans have proposed dozens of solutions designed to help control costs and improve quality — without surrendering control of your personal health care decisions to nameless bureaucrats in Washington, said Sen. Ron Johnson, R-Wis., during the Republican national address Nov. 17. That’s the opposite goal of health care reform. For their part, Republicans hav…	Throughout the health care debate, Republicans have proposed dozens of solutions designed to help control costs and improve quality — without surrendering control of your personal health care decisions to nameless bureaucrats in Washington, said Sen. Ron Johnson, R-Wis., during the Republican national address Nov. 17. The nonpartisan Congressional Budget Office predicted savings of about $12 bill…	Johnson said, "Republicans have proposed dozens of solutions designed to help control costs and improve quality" of health care in the United States.Republicans have circulated quite a few bills and ideas over the years, but there is almost nothing in most of the GOP proposals that directly addresses quality of care. As far as costs, most of the proposals have winners and losers. Some of the bill…	3	1	2	1	3	2	1	3	2	1	2	3
575.json	John McCain intervened, which helped Airbus get that Pentagon contract.	barely-true	The word 'intervening' is not a word I would use, he said. The whole reason there was a competitive bid for a contract to build the tankers is because McCain led a charge to scrap the Air Force's original plan, which was to lease jetliners from Boeing. The contract will now be re-bid. What's interesting about this attack is that McCain's role in this particular defense project has long been seen …	Did it help Airbus get the contract? "He was making sure there was a competition." "Intervening" is a subjective term. Besides, he said, McCain didn't have a vote on who got the contract, so he didn't have the power to steer it to either company.	Some would say two letters arguing against subsidy disputes not being included in the bid competition constitutes intervening. But to imply those letters swung the contract in Airbus' favor overstates McCain's influence.	1	2	3	1	2	3	1	2	3	1	2	3
4425.json	Since the beginning of the year weve created a net increase of 45,000 jobs.	barely-true	Our unemployment has ticked up because we’re not creating as many jobs as we need, but the fact is we are net up in job creation." And among his comments: "Since the beginning of the year we’ve created a net increase of 45,000 jobs. In the interview, Kasich rightly took credit for the budget balancing, adding that the improved credit outlook sends a message that Ohio is a good place to do busines…	There hasn’t been enough time for them to kick in, they say. Standard & Poors cited Ohio’s balanced budget as having a positive impact, but that didn’t happen until the end of June. Ohio has registered job growth since early last year, well before Kasich was elected. And while his efforts have received some positive reviews, there are many factors beyond the governor’s office that impact job grow…	And among his comments: "Since the beginning of the year we’ve created a net increase of 45,000 jobs. Our unemployment has ticked up because we’re not creating as many jobs as we need, but the fact is we are net up in job creation." Two experts we talked to agreed Kasich’s policies are pro-business. In the interview, Kasich rightly took credit for the budget balancing, adding that the improved cr…	1	3	2	1	3	2	1	3	2	1	2	3
2720.json	Says state Senate candidate Monk Elmer voted to exceed the (school district property tax) spending caps.	pants-fire	But that’s what the American Federation for Children did in a direct mail piece sent to residents of the 1st state Senate District, which stretches from the Fox Cities northeast to include the Door County peninsula. Among those receiving it: Elmer himself. But there’s been no evidence that the group has modified the claim. Indeed, Elmer says it has shown up in other pieces of direct mail.	Elmer, president of the Kimberly school board, didn’t recognize the name of the reporter or even the newspaper cited in the footnote: Amy Huddleston, Times-News correspondent. But there’s been no evidence that the group has modified the claim. The group sent out a direct mail piece headlined "Knock Knock, Monk Elmer and Higher Taxes are Calling." Yikes.	1,637 out of 2,000, and 27th of the 32 state schools on the list.) Let’s conclude with an obvious geography lesson: In a key state Senate race, the American Federation for Children reached for a great headline and issue to use against Democratic candidate Monk Elmer.	1	2	3	1	2	3	1	2	3	1	2	3
11083.json	Says Bill and Hillary Clinton attended Donald Trumps last wedding.	TRUE	Curbelo said Bill and Hillary Clinton were at Donald Trump's last wedding. Bill Clinton only made the reception, but Hillary Clinton did have a seat in the first row at the church in 2005. Both rubbed elbows with the stars at the reception.	The short answer is, yes, the Clintons did attend Trump’s 2005 wedding to Melania Knauss. "That’s part of the problem with the system. They were at his last wedding. He has contributed to the Clintons' foundation.	(PunditFact has found to be the case.) The short answer is, yes, the Clintons did attend Trump’s 2005 wedding to Melania Knauss. If I say go to my wedding, they go to my wedding. It was the then-58-year-old Trump’s third wedding.	1	2	3	1	2	3	1	2	3	1	2	3
6900.json	Says shes never said dont build Texas 45 Southwest.	half-true	But has she supported not building it? Were Huber’s actions to pull 45 out of the plan equivalent to saying "Don’t build it"? If the road weren’t in the plan, it wouldn’t be eligible for federal funding. In that capacity, she made an unsuccessful motion later in May 2010 to drop 45 from the plan.	But has she supported not building it? ... If the road weren’t in the plan, it wouldn’t be eligible for federal funding. Huber has taken action against the project both as a commissioner and as a member of the Capital Area Metropolitan Planning Organization.	As far as we can tell, there’s no instance of Huber being so blunt.	1	2	3	2	3	1	1	2	3	1	2	3
7271.json	It costs $10,000 a year to keep a child in school; it costs $30,000 a year to keep someone in prison.	TRUE	It costs $10,000 a year to keep a child in school; it costs $30,000 a year to keep someone in prison, he said. Are we very high on daily costs? The obvious fix, he says, is to lower the daily cost of incarceration. In this PolitiFact, we’re checking Kitzhaber’s math.	Kitzhaber, in his State of the State speech, implored lawmakers to work with him to boost spending for children and families, including more money into classrooms. As part of that initiative, he proposed lowering costs in health care and in prisons, as well as taking a hard look at tax expenditures and public pension reform. He asked lawmakers to keep two numbers in mind: $10,000 to keep a child …	It costs $10,000 a year to keep a child in school; it costs $30,000 a year to keep someone in prison, he said. What we’re trying to say is that both per day breakdowns come from the same source, the state.) (Capital spending per child was $777, but we’re going to stick with the $9,400 figure because the corrections cost does not include capital spending.) Right away, through the magic of the Inte…	3	1	2	1	2	3	1	2	3	1	2	3
1005.json	Obama used $20 million in federal money to emmigrate (sic) Hamas Refugees to the USA.	pants-fire	Nevertheless, the following day, Kyl withdrew the amendment after receiving a letter from the Department of State, which he entered into the Senate record. The letter, from Michael C. Polt, acting assistant secretary of state, states that the $20.3 million drawn from the Emergency Refugee and Migration Assistance Fund (ERMA) "will be used to provide humanitarian assistance to Palestinian refugees…	Then the meat: "Obama funds $20M in tax payer dollars to emmigrate (sic) Hamas Refugees to the USA. And it says the money was used in the Middle East. First, the chain e-mail. Relief and Works Agency supplemented $85 million the U.S. contributed in December 2008 (under President George W. Bush).	Then the meat: "Obama funds $20M in tax payer dollars to emmigrate (sic) Hamas Refugees to the USA. "Of that amount, $25 million supported UNRWA emergency operations in West Bank and Gaza," the release notes. "The remaining $60 million supported UNRWA’s services for 4.6 million Palestinian refugees in the region, including Gaza. And it says the money was used in the Middle East.	1	2	3	1	2	3	1	2	3	1	2	3
4161.json	Active duty males in the military are twice as likely to develop prostate cancer than their civilian counterparts.	mostly-true	However, that same research doesn’t conclude that military members are twice as likely to "develop" prostate cancer as Stearns said. The study hypothesizes that one reason for the different diagnosis rate may be because military members are subject to more frequent health screenings. Getting to the bottom of the discrepancy is actually why Stearns requested the money. That’s a needed clarificatio…	What caught our attention, though, was Stearns’ follow-up assertion: "In addition," he said, "active duty males in the military are twice as likely to develop prostate cancer than their civilian counterparts." These are really top people." Still, Simons cautioned that the potential for drawing a "false correlation" existed -- namely that military members are more likely to get prostate cancer tha…	Twice as likely? Still, Simons cautioned that the potential for drawing a "false correlation" existed -- namely that military members are more likely to get prostate cancer than non-military members. What caught our attention, though, was Stearns’ follow-up assertion: "In addition," he said, "active duty males in the military are twice as likely to develop prostate cancer than their civilian coun…	2	1	3	1	2	3	2	1	3	2	1	3
1873.json	Presidents Hoover, Truman and Eisenhower collectively ordered the deportation of at least 15 million illegal aliens.	FALSE	The official total from 1930 to 1960 is 477,000 formal removals and 5.4 million who left voluntarily. That 30-year period includes the entirety of Roosevelt's terms, not just the three presidents cited in the e-mail.	Experts we spoke to said that it wasn't credible that an even larger number of people could have been deported during that period. Still, the federal government was involved. Beyond that, the e-mail's description of this period is not far off. "What did Hoover, Truman, and Eisenhower have in common?	... Back during The Great Depression, President Herbert Hoover ordered the deportation of ALL illegal aliens in order to make jobs available to American citizens that desperately needed work. • On President Eisenhower: "Operation Wetback" was real, but the numbers of deportations cited in the e-mail are wildly high. And then again in 1954, President Dwight Eisenhower deported 13 million Mexican N…	2	3	1	1	3	2	2	3	1	2	3	1
656.json	There's only four senators senior to me ... there's still 44 older than me.	mostly-true	In all my time in the United States Senate, and I want you to know there's only four senators senior to me, but Barack, there's still 44 older than me, Biden said. It's true that with 35 years, Biden is one of the most senior lawmakers in the Senate, where seniority is based primarily on the length of consecutive Senate service. But Biden's not ranked fifth as he suggests. Rather, he's sixth, jus…	(69), Tom Harkin, D-Iowa (68), Harry Reid, D-Nev. (68), Patrick Leahy, D-Vt. (68), Lamar Alexander, R-Tenn. (68), Barbara Boxer, D-Calif. (67), Ben Nelson, D-Neb. (67), Bernie Sanders, I-Vt. (66), Max Baucus, D-Mont. (66), Mitch McConnell, R-Ky. (66), Joe Lieberman, I-Conn. (66), Jon Kyl, R-Ariz. (66), Byron Dorgan, D-N.D. (66) and Bill Nelson, D-Fla. (66 as of Sept. 29, 2008). But this is all re…	In all my time in the United States Senate, and I want you to know there's only four senators senior to me, but Barack, there's still 44 older than me, Biden said. It's true that with 35 years, Biden is one of the most senior lawmakers in the Senate, where seniority is based primarily on the length of consecutive Senate service. But Biden's not ranked fifth as he suggests. Domenici's 35 years are…	1	2	1	1	2	1	2	1	2	1	2	1
6684.json	This would be the largest casino in the United States.	pants-fire	Especially when they have called a press conference to counter deceptive campaigning by the other side. Her revised statement that the proposed casino would be the second largest in the country isn’t even close to accurate either. That shows a reckless disregard for accuracy.	Technically, this would not be the largest casino in the United States. At the event, campaign spokeswoman Cynara Lilly told reporters that The Grange, as it’s called, would be the largest casino in the United States." It would be the largest in the West." It would be the second largest.	Technically, this would not be the largest casino in the United States. At the event, campaign spokeswoman Cynara Lilly told reporters that The Grange, as it’s called, would be the largest casino in the United States." It would be the second largest. Maybe it would be the largest in Oregon, but we knew enough about mega-casinos to know that sounded overblown.	2	1	1	2	1	1	1	1	1	3	2	1
2149.json	Warren Buffett called (Jeff) Greenes scheme financial weapons of mass destruction.	FALSE	Still, there's no doubt Greene was heavily involved in buying credit default swaps, which are a type of derivative. And Buffett was exceptionally critical of derivatives. The problem with Meek's ad is that it gives the impression that Buffett criticized Greene personally, which he didn't do. By saying Buffett called Greene's scheme a bad idea, Meek personalizes a comment that had nothing to do wi…	Warren Buffett called Greene's scheme 'financial weapons of mass destruction.' We looked at Meek's statement that Greene "is the king of the undercover Credit Default Swap that brought about the destruction of our economy that we have right now." Here, we wanted to check the claim about Warren Buffett, that he "called Greene's scheme 'financial weapons of mass destruction.' (Read our full report.)	Warren Buffett called Greene's scheme 'financial weapons of mass destruction.' We looked at Meek's statement that Greene "is the king of the undercover Credit Default Swap that brought about the destruction of our economy that we have right now." 317 on the Forbes list) would have made it onto Buffett's radar. We should note here that journalists love Buffett's phrase "financial weapons of mass d…	1	2	3	1	3	2	3	2	1	1	3	2
7877.json	Black children constitute 18 percent of the nations public school population but 40 percent of the children who are suspended or expelled.	mostly-true	Black children constitute 18 percent of the nation's public school population but 40 percent of the children who are suspended or expelled, they wrote. Are 40 percent of students suspended or expelled in America’s public schools black? They found although black students made up 18 percent of the nation’s public school population, they accounted for 35 percent of students suspended at least once a…	About 20 percent of the students suspended were Hispanic. Black students made up about 38 percent of expulsions in one category and 42.5 percent of expulsions in another category, the 2006 report showed. Our conclusion: Lewis co-wrote that black students make up 18 percent of the students in America’s public schools but 40 percent of students who are suspended or expelled. The percentage of the U…	Black children constitute 18 percent of the nation's public school population but 40 percent of the children who are suspended or expelled, they wrote. White students were slightly ahead, accounting for 39.1 percent of those suspended. Are 40 percent of students suspended or expelled in America’s public schools black? Again, we were focused on whether the statistics used to make the claim were ac…	1	2	3	3	2	1	3	2	1	1	2	3
1061.json	The war spending bill actually spends more money on the International Monetary Fund than on the war.	barely-true	But he's right that there's a potential for the U.S. Treasury, over time, to give the IMF quite a chunk of change as a result of the line of credit.	We wondered if it was possible that a war funding bill would have more money for the IMF than the wars. So as for Westmoreland's claim, he's wrong that the appropriations bill spends more money on the IMF than for the war. Among the Republicans sounding off was Rep. Lynn Westmoreland of Georgia, who wrote this on his party's blog: "We’re getting an alleged war spending bill that actually spends m…	Among the Republicans sounding off was Rep. Lynn Westmoreland of Georgia, who wrote this on his party's blog: "We’re getting an alleged war spending bill that actually spends more money on the International Monetary Fund than on the war," he wrote. We wondered if it was possible that a war funding bill would have more money for the IMF than the wars. Not so fast. The bill does establish a $100 bi…	3	1	2	2	3	1	3	2	1	3	2	1
11639.json	It is already in the law that there is a requirement to screen (refugees) for religion.	mostly-true	It is already in the law that there is a requirement to screen for religion, Bush said Nov. 29, 2015. Still, experts said it is standard practice to ask refugees about their religion, even if they are not specifically escaping religious persecution. But if their fear stems from their political views, then there is no obligation to ask about their religion. We decided to look at whether American o…	Bush said that there is a legal requirement to screen for religion. U.S. immigration law does state that American officials must dig into a person’s religion if their refugee status is based on a fear of religious persecution. In practice, questions about religion are common even if they are not required. His statement is accurate but needs clarification.	It is already in the law that there is a requirement to screen for religion, Bush said Nov. 29, 2015. According to the department’s press office, the resettlement centers routinely ask about religion. Frelick said religious affiliation is a typical but optional question for refugees. Still, experts said it is standard practice to ask refugees about their religion, even if they are not specificall…	1	2	1	1	2	1	1	2	1	1	2	1
7838.json	Says the word Dhimmitude is on page 107 of the health care law and means Muslims are specifically exempted from the government mandate to purchase insurance.	pants-fire	It's on page 107 of the health care bill. The health care law has a general exception for religious conscience (see page 128). But that’s not the case either. A chain email claims "dhimmitude" is on page 107 of the health care law, and it means Muslims will be exempt from the health care law.	Muslims are not specifically exempted. And if anyone is exempted, it’s a small number of Christian groups. https://www.sharethefacts.co/share/c1619e80-19f5-4804-a3c6-94a8a875f051	A chain email claims "dhimmitude" is on page 107 of the health care law, and it means Muslims will be exempt from the health care law. Pretty interesting. It's on page 107 of the health care bill. What is "Dhimmitude"?	1	2	3	1	2	3	1	3	2	1	2	3
4400.json	Says Jon Huntsman supports changes in Medicare that would deny guaranteed benefits to 980,000 New Hampshire residents.	half-true	The Medicare program does guarantee a set of benefits, Baker said. For this fact-check, we're going to examine whether Huntsman supports the Republican Medicare plan from U.S. Rep. Paul Ryan and whether it indeed would end "guaranteed benefits" to the 980,000 people. The Huntsman campaign told us that Huntsman considers the Ryan plan a "good step forward." Other analysts also shun the word "guara…	For this fact-check, we're going to examine whether Huntsman supports the Republican Medicare plan from U.S. Rep. Paul Ryan and whether it indeed would end "guaranteed benefits" to the 980,000 people. The Huntsman campaign told us that Huntsman considers the Ryan plan a "good step forward." And as for the 980,000, that is roughly the population of people in New Hampshire under 55, the age group t…	The New Hampshire Democratic Party Chair said Huntsman supports a GOP Medicare plan that would deny guaranteed benefits to 980,000 Granite Staters. He’s right about Huntsman's position and the number of New Hampshire residents that would be affected. But he ignores that there is the possibility that the current benefits could be trimmed and he is exaggerating the facts about the Ryan plan. Many d…	3	2	1	3	2	1	2	1	3	3	2	1
10517.json	Ninety-six percent of failing schools are spending above $8,400, the average annual per student expenditure, and 26 percent spend considerably more than that.	half-true	His statement doesn’t point out that the failing schools are likely spending more money because they are receiving more money as a result of having high concentrations of students from low-income families. It could be argued that the money they receive and spend isn’t working -- afterall, they are failing schools by the state’s current measure of success, the CCRPI index. Or it could be said that…	We wondered if the vast majority of these failing schools are, as the governor said, spending more money per student than the average school. "I would say to them that 96 percent of those (failing schools) pay more than the average of the state of $8,400 per child per year, and about 26 percent of them spend considerably more than the state average," the governor said. We decided to check the gov…	We wondered if the vast majority of these failing schools are, as the governor said, spending more money per student than the average school. "We need flexibility on how we spend our salary dollars to keep the best in the lowest performing schools." "But I don’t know if this is the answer," Jackson said. "I would say to them that 96 percent of those (failing schools) pay more than the average of …	1	3	2	1	3	2	3	1	2	1	3	2
2717.json	Of the more than 1.3 million temporary mortgage modifications, over half have defaulted.	half-true	In the final full week of the U.S. Senate race, how did Rubio fare on his numbers about the mortgage modification program? Rubio said "over 1.3 million temporary work-outs, over half have now defaulted,'' referring to a temporary mortgage modification program.	Over 1.3 million temporary work-outs, over half have now defaulted,'' he said. There have been 500,000 permanent (modifications). Rubio also said that more than half of those 1.3 million had defaulted." Rubio: "The temporary modifications.	Rubio also said that more than half of those 1.3 million had "defaulted." "Over 1.3 million temporary work-outs, over half have now defaulted,'' he said. Of those permanent modifications, the majority survived while almost 29,000 were cancelled. The chart states that 699,924 trials had been cancelled -- so note that is slightly more than half.	2	2	1	2	2	1	1	1	2	2	2	1
814.json	The race will tighten, just because that's what happens at the end of campaigns. They always have.	mostly-true	(Gore briefly polled better than Bush in 2000, but that was for just one out of the last 21 days. Similarly, Carter polled better than Reagan in 1980, but for only three out of the last 21 days.) But we're not in the prediction business, we're in the fact business. And the fact is, 14 out of the last 16 elections have tightened in the final few weeks of the campaign.	I mean, I – we think that the race will tighten, just because that's what happens at the end of campaigns. The 1960 election didn't get any tighter at the end either. Their spreadsheet enabled us to see, for instance, that in 1972, Richard Nixon was polling at 67.8 percent 17 days before the election. So yes, that election did tighten at the end.	"I mean, I – we think that the race will tighten, just because that's what happens at the end of campaigns. The 1960 election didn't get any tighter at the end either. Their spreadsheet enabled us to see, for instance, that in 1972, Richard Nixon was polling at 67.8 percent 17 days before the election. So yes, that election did tighten at the end.	1	2	2	1	2	2	1	2	2	1	2	2
8979.json	Says Tom Cottons vote in Congress to change Medicare will increase out-of-pocket expenses for every senior in Arkansas.	barely-true	It says here Cotton voted in Congress to change Medicare into a voucher system that will increase out-of-pocket expenses for every senior in Arkansas, Courtney said, pointing to her laptop. But Pryor’s ad implies that the voucher system alone would affect costs like this for all seniors, rather than the Affordable Care Act. That’s a far cry from the ad’s claim that a voucher system would increase…	Pryor’s campaign ad said, "Cotton voted in Congress to change Medicare into a voucher system that will increase out-of-pocket expenses for every senior in Arkansas." Cotton did vote for a voucher-like system under two different budget proposals. The research isn’t conclusive, and we can’t predict the future. But even the voucher proposals go out of their way to leave current Medicare beneficiarie…	It says here Cotton voted in Congress to change Medicare into a voucher system that will increase out-of-pocket expenses for every senior in Arkansas, Courtney said, pointing to her laptop. But Pryor’s ad implies that the voucher system alone would affect costs like this for all seniors, rather than the Affordable Care Act. Over years, though, under Ryan’s plan, the age for Medicare eligibility w…
6264.json	Because of the health care act, The people who have health care and like it in this county are not going to be able to keep what they have.	barely-true	Cantor said that because of the health care law, "The people who have health care and like it in this country are not going to be able to keep what they have." His statement suggests that losing the health insurance you like is guaranteed by the law. His office cites the bleakest of nine scenarios in Deloitte studies, under which 42 percent of workers would lose their company insurance. The Canto…	Frankly, the people who have health care in this country and like it will not be able to keep what they have, Cantor said. That could happen if more than 25 percent of large corporations with over than 5,000 employees and more than 50 percent of smaller businesses stopped offering insurance. Deloitte did find that, in a worse case scenario, 65 million workers could lose their employer-based insur…	Frankly, the people who have health care in this country and like it will not be able to keep what they have, Cantor said. Is Cantor right that if you like it your health insurance, you will lose it? Deloitte did find that, in a worse case scenario, 65 million workers could lose their employer-based insurance by the end of the decade because of the health care law. The nonpartisan Congressional B…	1	2	3	3	1	2	3	2	1	1	2	3
6774.json	Bill Nelson voted to confirm Sonia Sotomayor, who signed a Supreme Court opinion saying Americans do not have an individual right to own firearms.	mostly-true	For this fact-check, we wanted to confirm whether Nelson voted for Sotomayor and if she signed an opinion that said "Americans do not have an individual right to own firearms." The second part -- that she signed a Supreme Court opinion saying Americans do not have an individual right to own firearms -- is a little harder to understand (at least, for those of us not trained in legalese). Advocates…	The NRA is correct in saying Nelson voted to confirm Sonia Sotomayor as an associate justice of the Supreme Court. And many experts see the group’s assertion that she signed an opinion "saying Americans do not have an individual right to own firearms" as fair. We heard lots of agreement from experts about this characterization, though two advocates of gun control said it is over-simplified. Gun-c…	For this fact-check, we wanted to confirm whether Nelson voted for Sotomayor and if she signed an opinion that said "Americans do not have an individual right to own firearms." The second part -- that she signed a Supreme Court opinion saying Americans do not have an individual right to own firearms -- is a little harder to understand (at least, for those of us not trained in legalese). One of it…	2	1	3	2	1	3	1	3	2	2	1	3
13324.json	Ford is moving all of their small-car production to Mexico.	mostly-true	Ford is moving all of their small-car production to Mexico. Is it really true that Ford is moving all of their small car production to Mexico"? So Trump is right that the company is moving all small-car production in North America to Mexico. "Companies like Carrier are firing their workers and moving to Mexico," Trump said.	Trump said that "Ford is moving all of their small-car production to Mexico." That’s correct as far as it goes, but framing it that way ignores an important qualifier -- that no U.S. jobs will be lost in the transition. The company says that workers at the Ford plant in question will instead make SUVs and pickups. https://www.sharethefacts.co/share/0f5ed3db-289b-4d1c-a1d6-4c03ac61e82e	Is it really true that "Ford is moving all of their small car production to Mexico"? "Ford is moving all of their small-car production to Mexico. "Companies like Carrier are firing their workers and moving to Mexico," Trump said. The Focus and the C-Max are considered small cars.	3	1	2	2	3	1	1	3	2	3	1	2
2514.json	The federal government can tell General Motors what to charge for its automobiles.	FALSE	Based on that, the government does in fact have a 61 percent stake in GM. "GM repaid the government $6.7 billion," Griffanti said in a statement. "The remaining money was converted to a 61 percent ownership stake in GM plus $2.1 billion worth of preferred stock. However, Zaring said he has watched closely to see whether that has happened and, so far, it hasn't.	Let's begin with some background about the federal government's role in the automaker's management. Does the federal government have that type of influence? A Treasury Department spokesman forwarded us testimony in December from Assistant Secretary Herbert Allison, who said government involvement in the day-to-day management of GM is not its goal. In exchange, the government took a 60 percent con…	It's easy to overstate how overinterventionist the government is being, Zaring said. There's no written language in the GM contract with the federal government that states Uncle Sam has any control over vehicle pricing. The board has not gotten involved in such matters, according to GM and others who have paid attention.	3	2	1	2	3	1	1	2	3	3	2	1
12943.json	Under Hillary Clintons plan illegal immigrants convicted of committing crimes get to stay.	half-true	Instead those were crimes in the immigration statutes." This fact-check will focus on whether Clinton supports allowing illegal immigrants convicted of crimes to stay in the country. Illegal immigrants convicted of committing crimes get to stay," states the ad. Alex Nowrasteh, an immigration expert at the libertarian Cato Institute, said it’s clear that Clinton favors legalization for many undocu…	Illegal immigrants convicted of committing crimes get to stay," states the ad. This fact-check will focus on whether Clinton supports allowing illegal immigrants convicted of crimes to stay in the country. "Looking at Hillary’s statements, it’s clear that Trump’s ad is misleading," he said. Clinton has repeatedly called for focusing deportations on violent criminals.	Trump says "In Hillary Clinton’s America ... illegal immigrants convicted of committing crimes get to stay." The tone of the ad is to scare voters into thinking that Clinton would welcome convicted criminals to remain in the country illegally, and that’s an exaggeration. Clinton has said that she will deport "violent criminals" as well as anyone who threatens our safety. She hasn’t been more spec…	2	2	1	2	1	3	1	3	2	2	3	1
7904.json	Says the success of his economic agenda is supported by the fact we went from unemployment at 9.2 percent when I decided to run for governor four years ago to two points lower.	barely-true	Walker said the success of his agenda is supported by the fact that "we went from unemployment at 9.2 percent when I decided to run for governor four years ago to two points lower." Walker’s numbers are on target if you go back "four years." But he muddies the waters by describing that as when he "decided to run" -- and that skews the picture when it comes to improvement. His decision came at an …	We went from unemployment at 9.2 percent when I decided to run for governor four years ago to two points lower. Walker says the success of his economic agenda is supported by the fact that "we went from unemployment at 9.2 percent when I decided to run for governor four years ago to two points lower." So one-third of the drop compared to four years ago came during Walker’s administration. That le…	We went from unemployment at 9.2 percent when I decided to run for governor four years ago to two points lower. Walker says the success of his economic agenda is supported by the fact that "we went from unemployment at 9.2 percent when I decided to run for governor four years ago to two points lower." But the statement is complicated by other factors, especially the phrase "when I decided to run.…	1	3	2	3	2	1	3	1	2	1	3	2
8576.json	Nearly 20% of our residents are born abroad.	TRUE	Austin is truly an international city. Nearly 20 percent of our residents are born overseas, an Austin city official, Natalie Betts, said in a Nov. 8, 2013, press release about an orientation session in Austin’s International Welcome Program. Only 23 percent of Austin’s foreign-born residents were U.S. citizens, according to the survey. In fact, about one-tenth of all Austinites were born in Mexi…	A City of Austin official said, "Nearly 20 percent of our residents" are born abroad. Such residents made up 19.3 percent of the city’s population in the 2007-11 period covered by a federal survey. Click here for more on the six PolitiFact ratings and how we select facts to check.	Census spokeswoman Virginia Hyer told us by phone that the bureau most recently published results of a survey covering 2010-12, which similarly indicated that about 19 percent of Austinites were born abroad. Nearly 20 percent of our residents are born overseas," an Austin city official, Natalie Betts, said in a Nov. 8, 2013, press release about an orientation session in Austin’s International Wel…	1	3	2	2	1	3	1	3	2	2	3	1
2445.json	Its not true that since hes been the president, executions in Iran have increased by four times.	FALSE	And, while even the human rights groups acknowledge their numbers are imprecise (and likely under-reported), the same method for gathering the data has been used for years. That seems the best way, under the circumstances, to establish a trend.	That is not true at all, Ahmadinejad responded. "They haven't come to Iran." In contrast, Amnesty International recorded at least 388 executions in Iran in 2009 (the U.S. had 52). According to Amnesty International's tally, there were at least 94 people executed in Iran in 2005, including at least eight aged under 18 at the time of the crime.	That is not true at all, Ahmadinejad responded. "Not at all. Not at all." In an interview on ABC's This Week, host Christiane Amanpour asked Iranian president Mahmoud Ahmadinejad if he was aware that "since you've been the President executions in Iran have increased by four times."	2	1	3	2	1	3	2	3	1	2	1	3
2852.json	More than 10 years of free trade has brought a $2 billion per day trade deficit.	mostly-true	After all, he said in a news release, more than 10 years of free trade deals have "brought a $2 billion per day trade deficit and the loss of millions of manufacturing jobs -- jobs that should go to Ohio's skilled workers." But what about Brown’s other point -- that more than 10 years of trade under the North American Free Trade Agreement and trade relations with China has resulted in a trade def…	After all, he said in a news release, more than 10 years of free trade deals have "brought a $2 billion per day trade deficit and the loss of millions of manufacturing jobs -- jobs that should go to Ohio's skilled workers." That would make Brown’s $2 billion-a-day figure somewhat high. But what about Brown’s other point -- that more than 10 years of trade under the North American Free Trade Agree…	Yet even if we were to put those numbers aside and only use the Commerce Department numbers, Brown’s figures were close to the mark before the recession. This year is not the best year to measure the normal effects of trade, and no one can predict the future; perhaps the trade deficit will stabilize at a lower number such as $500 billion a year, or $1.36 billion a day. Perhaps it won’t.	3	2	1	3	2	1	3	1	2	3	2	1
11917.json	North Koreas missiles are not going to have a capability to reach the United States anytime real soon.	TRUE	And by the way, they’re not going to have a capability to reach the United States anytime real soon, but it is inevitable over time they will," McCain said when asked about what the United States should do in response to the launch. We wondered just how close North Korea is to reaching the United States via missile, so we put McCain’s statement through a fact-check. Clapper said North Korea is "c…	And by the way, they’re not going to have a capability to reach the United States anytime real soon, but it is inevitable over time they will," McCain said when asked about what the United States should do in response to the launch. We wondered just how close North Korea is to reaching the United States via missile, so we put McCain’s statement through a fact-check. Clapper said North Korea is "c…	McCain said of North Korea’s missile program, "They’re not going to have a capability to reach the United States anytime real soon, but it is inevitable over time they will." His statement is a bit of a generalization, but he’s right. North Korea may have the missile technology -- and range -- to strike the United States, but it hasn’t been tested. Experts on missile technology agreed with McCain.	1	2	3	3	2	1	1	2	3	3	1	2
7334.json	Says his budget provides the highest state funding level in history for education.	half-true	Scott said his budget "includes $10.7 billion in state funding for Florida K-12 schools, the highest state funding level in history." Floridians hearing this statement might think that means education funding for Florida schools has never been higher. That's not the case. Actually, Scott is referring only to the state government's specific contribution to overall spending. Scott drums up the stat…	He wants the state to spend $18.47 billion for education during the 2013-14 school year. Again, the state’s share of that would be about $10.7 billion. In terms of the state’s actual dollar investment, Scott is right that it would be the highest. One is to look at spending per student.	This total includes $10.7 billion in state funding for Florida K-12 schools, the highest state funding level in history, Scott said in a Jan. 31, 2013, news conference about his 2013-14 budget recommendations. In terms of the state’s actual dollar investment, Scott is right that it would be the highest. What’s in the $1.2 billion increase from last year’s education spending? So if the Legislature…	1	3	2	3	2	1	3	1	2	1	3	2
9891.json	Saturday Night Live executive producer Lorne Michaels could be put in jail under this amendment for making fun of any politician.	half-true	Cruz said that "Lorne Michaels could be put in jail under this amendment for making fun of any politician." Most experts we talked to agreed that the proposed amendment’s language left open the door to that possibility. But many of those same experts emphasized that prosecuting, much less imprisoning, a comedian for purely political speech would run counter to centuries of American tradition, and…	By any measure, NBC is a corporation, Cruz said in the interview. Well, NBC, which airs Saturday Night Live, is a corporation. "Every one of these is a corporation," Cruz said. • SNL is unlikely to benefit from the proposal’s press-freedom exemption.	And the amendment says the government can prohibit such entities from spending money to influence elections. Well, NBC, which airs Saturday Night Live, is a corporation. Cruz, however, argues that the proposed amendment severely threatens First Amendment protections that date back more than two centuries. … Congress would have the power to make it a criminal offense.	1	3	2	1	3	2	1	3	2	1	3	2
6945.json	Sherrod Brown supported President Obamas $453 billion tax increase.	barely-true	That includes the 30-second TV ad "Vision," which says, "Sherrod Brown supported President Obama's $453 billion tax increase" (and) "higher taxes on manufacturers that could cost Ohio jobs." That's the "$453 billion tax increase" in the ad. The legislation included much more than just the surtax cited in the ad. But the claim in the ad leaves out critical facts that would give a different impress…	We asked Crossroads how it backed up the claim about the $453 billion tax increase. PolitiFact Ohio looked at the second claim when it was included in an earlier Crossroads ad. That includes the 30-second TV ad "Vision," which says, "Sherrod Brown supported President Obama's $453 billion tax increase" (and) "higher taxes on manufacturers that could cost Ohio jobs." That's the "$453 billion tax in…	A review of the legislation by the non-partisan CBO identified $272 billion in tax relief for individuals and businesses, with tax cuts for businesses that hire new employees. The vote that the ad cites was not a vote on passage of the legislation, but rather a procedural vote to open debate. The legislation never became law.	2	3	1	2	3	1	1	2	3	2	3	1
3455.json	The coalition of Arab states against Libyas Moammar Gadhafi is the biggest coalition against a fellow Arab leader since the Persian Gulf War in 1990-1991.	TRUE	But they didn’t, and now they have. And I wouldn’t say that’s trivial." Stephen McInerney, executive director of the Project on Middle East Democracy, agreed, saying that the difference between the lack of Arab support for the Iraq War and the support for the situation in Libya is "extremely significant." The full history of this episode remains to be written.	Wright agreed, saying, "And we haven't had one like this since the Iraq war back in 1990-1991. We wondered whether Wright was correct about the scope of Arab support for these alliances. …" Amanpour interjected, "Which is really unusual, to have such a big Arab coalition against a fellow Arab leader." Attacks began on March 19.	The Persian Gulf War The Persian Gulf War was waged to eject Iraqi troops from Kuwait, which had been invaded by Iraqi leader Saddam Hussein in August 1990. …" Amanpour interjected, "Which is really unusual, to have such a big Arab coalition against a fellow Arab leader." Later, in comments to reporters in Cairo, he reaffirmed support for the coalition’s efforts. For starters, support for the Lib…	3	1	2	3	1	2	3	1	2	3	1	2
13423.json	The media never show crowds.	FALSE	They never show crowds. They don't show crowds." See Figure 5 on PolitiFact.com See Figure 2 on PolitiFact.com BuzzFeed News political reporter Rosie Gray tweeted a video of Trump’s crowd in Newton, Pa., booing the media.	Trump said that the media "never show crowds" at his rallies. The media has documented Trump’s crowds through stories, social media, photos and videos. https://www.sharethefacts.co/share/47dcbd66-e130-4850-9aa6-01a1e236246b	We wondered if the media really never showed Trump crowds, so we turned to the archives and a former CBS photojournalist to figure it out. They never show crowds. They don't show crowds." See Figure 2 on PolitiFact.com BuzzFeed News political reporter Rosie Gray tweeted a video of Trump’s crowd in Newton, Pa., booing the media.	3	2	1	3	1	2	1	3	2	3	1	2
1892.json	The House has never failed to pass a budget in the modern era.	TRUE	For fiscal year 2003, the Senate, then under Democratic control, failed to pass a budget resolution of any kind, and on three other occasions (fiscal years 1999, 2005 and 2007) the House and Senate failed to reconcile their different bills and pass a compromise measure. Because Congress always works on the budget resolution for the coming fiscal year, the Republican Congressional majority failed …	That's why the expected failure of the Democratic House majority to pass a budget for fiscal year 2011 has become a talking point for Republicans. Unlike the appropriations bills, the budget resolution doesn't carry the force of law. According to the Congressional Research Service, the nonpartisan research arm of Congress, the House has indeed passed a budget every year since the Congressional Bu…	So if the House does not pass a budget for fiscal year 2011, it will be the first time since the current rules went into force. Hoyer said that "the Republicans didn't have a budget in '02, '04, '06," while Boehner claimed "the House has never failed to pass a budget in the modern era." Since 1983 -- the first year the House and Senate stopped passing two budget resolutions annually and began pas…	1	3	2	3	2	1	2	3	1	2	3	1
12728.json	Our economy is not growing.	FALSE	Our fact-check will focus on Scott’s statement that the economy is "not growing." Our economy is not growing. And the growth rate for the second term of President George W. Bush was well below 1 percent. Economic growth A key way to measure economic growth is the gross domestic product, or GDP, which is the sum total of a country’s economic activity.	Scott said, "Our economy is not growing." The GDP has grown between 1.5 and 2.5 percent each year since 2010. https://www.sharethefacts.co/share/c5eac01a-ba69-47a7-a778-3f79a143f472	Our economy is not growing. Our fact-check will focus on Scott’s statement that the economy is "not growing." In addition to the growing GDP, they mentioned other positive economic signs, such as growing private sector jobs and the decline of the unemployment rate since the end of the recession. And the growth rate for the second term of President George W. Bush was well below 1 percent.	3	2	1	3	1	2	3	1	2	3	1	2
6858.json	Says opponent U.S. Rep. Gwen Moore is Wisconsins most absent member of Congress, missing nearly 17 percent of the House votes in the second quarter of 2012.	mostly-true	Then he turns to the ad’s main point: "Gwen Moore is Wisconsin’s most absent member of Congress, missing nearly 17 percent of the House votes in the second quarter of 2012." If you take out the first two quarters of 2012, Moore missed an average of 3.4 percent of the votes in the other five quarters of this session. In the second quarter, the one cited by Sebring, the missed votes easily put Moor…	Sebring says Moore is the state’s "most absent" member of Congress and that she missed 17 percent of the House votes in the second quarter of 2012. Indeed, Moore missed nearly 17 percent of the votes in the second quarter. That is Moore’s worst quarter, but it also amounts to Sebring doing some cherry-picking of data. A longer period shows a lower percentage, but even that places Moore at the top…	Then he turns to the ad’s main point: "Gwen Moore is Wisconsin’s most absent member of Congress, missing nearly 17 percent of the House votes in the second quarter of 2012." That, again, compares to the median of 2.5 percent, according to GovTrack. Overall, the state delegation missed an average of 2.53 percent of the votes this session. But what about the other part of Sebring’s claim, that Moor…	2	1	3	3	2	1	3	1	2	3	2	1
11865.json	Gene Green is the NRAs favorite Democrat in Congress. ... Its no wonder the congressman has a lifetime A rating from the NRA.	barely-true	Adrian Garcia said that his competitor in the Democratic race for Texas’ 29th district, Rep. Gene Green, has a "lifetime A rating" from the NRA and is the NRA’s "favorite Democrat in Congress." Green has certainly been a strong supporter of gun rights over his 23 years in the House. The gun control measures Green’s campaign pointed out that he supported were part of packages like the 1994 crime b…	Lifetime rating? Garcia continued: "It’s no wonder the congressman has a lifetime A rating from the NRA. "Gene Green is the NRA’s favorite Democrat in Congress," Garcia was quoted saying in his own Jan. 7, 2016, campaign media release. We also wanted to check if Green has a "lifetime A rating" from the NRA and, although it’s harder to judge, if he could be the organization’s "favorite Democrat."	Garcia continued: "It’s no wonder the congressman has a lifetime A rating from the NRA. "Gene Green is the NRA’s favorite Democrat in Congress," Garcia was quoted saying in his own Jan. 7, 2016, campaign media release. Garcia claimed Green had a "lifetime A rating" from the NRA. Lifetime rating?	1	2	3	3	2	1	3	2	1	1	2	3
7994.json	Says Texas has more than 80,000 abortions each year.	barely-true	The number of Texas abortions reported in 2008 -- the year with the most recent data available at that time -- was 81,591, according to the state agency. In February 2011, when state Sen. Dan Patrick, R-Houston, aired the 80,000 figure, we rated his statement as True based on information from Texas’ Department of State Health Services and the New York-based Guttmacher Institute. The 2008 Texas ta…	Neither the Texas agency or Guttmacher had guidance for us on why the number of Texas abortions has declined. The number of Texas abortions reported in 2008 -- the year with the most recent data available at that time -- was 81,591, according to the state agency. Regarding the latest state figures indicating about 72,000 abortions in the state in 2011, Macias said that with abortion totals rangin…	Stickland said there are "80,000+" abortions each year in Texas.	3	2	1	3	2	1	3	2	1	3	2	1
3541.json	Across the United States, 25 percent of voting age African Americans do not have the photo ID that this bill would require.	half-true	Across the United States, 25 percent of voting age African Americans do not have the photo ID that this bill would require, Budish wrote. Surely there are African-Americans in the United States who don’t have photo ID (as do a portion of every racial group), but could a full quarter of 41 million black Americans be without IDs? It was clear that one five-year-old national survey had found a quart…	Budish was using the national statistic to argue that the new law would disproportionately impact potential black voters in Ohio. Yet there has been no study of this issue in Ohio so there are no specific figures for the state population. ID rates in other states where studies were done differed greatly. So while Budish’s statement is accurate, it leaves out those important details needed to unde…	Across the United States, 25 percent of voting age African Americans do not have the photo ID that this bill would require, Budish wrote. Among the African Americans, 25 percent have no current government-issued photo ID, according to the survey. This study found that only 6.8 percent of blacks did not have a proper government-issued photo ID. Surely there are African-Americans in the United Stat…	2	3	1	2	3	1	2	1	3	2	3	1
6745.json	Says Barack Obamas comments indicate he believes in redistribution of wealth.	mostly-true	Obama was even critical of some government agencies in Chicago in the clip. Obama also spoke about ways to foster competition and innovation. Obama spoke of redistribution in a way that government can create an even playing field for everyone and encourage competition. The clip of the 1998 audio that Romney referenced to criticize Obama doesn’t tell the complete story.	Romney then said he believes in free enterprise, not redistribution of wealth. "There’s a tape that came out just a couple of days ago where the president said, yes, he believes in redistribution," Romney, the Republican Party presidential nominee, said during a fundraiser Wednesday afternoon in Atlanta. Obama campaign officials said Romney’s discussion of the recording was the sign of a desperat…	Romney then said he believes in free enterprise, not redistribution of wealth. Obama campaign officials said Romney’s discussion of the recording was the sign of a desperate campaign. In the Fox News interview, Romney gave his interpretation of what he believed Obama meant. "There’s a tape that came out just a couple of days ago where the president said, yes, he believes in redistribution," Romne…	1	3	2	1	3	2	1	3	2	1	3	2
9052.json	Dan Patrick called for increasing the gas tax and the state sales tax.	mostly-true	He did? Yet his opponent in a May 27, 2014, runoff for the nomination, incumbent David Dewhurst, aired a TV ad before the March primary in which the narrator declares that Patrick "called for increasing the gas tax and the state sales tax." We searched the Nexis database for relevant news stories on Patrick's positions on the taxes. By email, Dewhurst spokesman Travis Considine sent us abackup do…	Sales tax From June 2008 into May 2012, news stories show, Patrick spoke in favor of increasing the state sales tax. Lawmakers last raised the state gas or motor fuels tax, of 20 cents a gallon, in 1991 and last increased the statewide sales tax, to 6.25 percent, in 1990, the House Research Organization noted in a March 11, 2011, report. Yet his opponent in a May 27, 2014, runoff for the nominati…	Dewhurst said Patrick "called for increasing the gas tax and the state sales tax." Patrick piped up once for regular gas tax increases, in a 2009 talk, also making it clear that related revenue should pay for transportation projects. Finally, Patrick has not made increasing either tax a theme of his campaign for lieutenant governor. Click here formore on the six PolitiFact ratings and how we sele…	2	1	3	2	3	1	2	1	3	1	3	2
10799.json	After laying off 30,000 people,Carly Fiorina said that in retrospect, I would have done them all faster.	half-true	‘I would have done them all faster.’ "—Carly Fiorina" Is the cyber-squatter -- who didn’t identify themselves on the site -- correct? The charge was made in an attack ad by Boxer. The 30,000 number is largely accurate (we fact-checked it back in 2010), but we wondered whether it’s correct that Fiorina actually said she would have rather laid off people faster. And what does she say she would have…	‘I would have done them all faster.’ "—Carly Fiorina" Is the cyber-squatter -- who didn’t identify themselves on the site -- correct? And what does she say she would have done differently? " "So I'm using it to tell you how many people she laid off at Hewlett-Packard. After much scrolling, the page concludes: "That's 30,000 people she laid off.	While the number is accurate -- acknowledged in a 2006 interview by Fiorina -- the comment that "I would have done them all faster" is pulled out of context. In fact, Fiorina was more specifically referring to her decisions to force out a small number of top-level executives, not tens of thousands of rank-and-file employees.	3	2	1	3	2	1	2	1	3	2	3	1
6207.json	Says our 12 month job increase was the sixth highest in the nation.	half-true	But in claiming "our 12 month job increase was the sixth highest in the nation," the Republican governor also was making a familiar mistake, PolitiFact New Jersey found. "Our 12 month job increase was the sixth highest in the nation and we’re seeing housing sales, car sales and personal income increasing at higher rates than the nation." Christie’s claim is right in terms of the net increase, but…	The percentage increase of nearly 1.6 percent leaves the state in 13th place. To comment on this ruling, go to NJ.com.	The governor made the same mistake in February, when he said private-sector job growth in 2011 "places New Jersey in the top third among all of the states." But in claiming "our 12 month job increase was the sixth highest in the nation," the Republican governor also was making a familiar mistake, PolitiFact New Jersey found. He received a Half True, because his claim was right for the net increas…	1	3	2	3	1	2	1	2	3	1	3	2
13184.json	Says Tim Kaine actually tried to raise taxes by about $4 billion.	mostly-true	He actually tried to raise taxes by about $4 billion, Pence said of Kaine’s record as Virginia governor from 2006 to 2010. He rolled out a plan to raise about $1 billion a year for the state’s longstanding transportation woes. We should note that Senate Republicans that year unsuccessfully proposed a bill -- different from Kaine’s proposal -- that also would have raised taxes by $1 billion for tr…	He actually tried to raise taxes by about $4 billion, Pence said of Kaine’s record as Virginia governor from 2006 to 2010. The presidential nominee said that Kaine, during his first week as governor, "proposed a nearly $4 billion tax increase." He rolled out a plan to raise about $1 billion a year for the state’s longstanding transportation woes. Trump’s campaign backed the statement by taking th…	Pence said that when Kaine was governor, "He actually tried to raise taxes by about $4 billion." Pence was referring to three unsuccessful tax hikes proposed by Kaine. Two of them, in 2006 and 2008, were for transportation. The third, in 2009, was to raise general funds for the state. Added up, they come to $4 billion in proposed tax hikes and fees. There’s a couple of issues, however. Kaine’s 20…	3	2	1	1	2	3	3	2	1	3	2	1
4323.json	When lenders foreclose on homes, they typically suffer losses that exceed 30 percent of the value of the home.	mostly-true	It concluded that foreclosure discounts are on average 27 percent of the value of a house. Again, this is a measure of prices, not a measure of what losses the lender actually realizes. Finally, the briefing paper from Mortgage Bankers Association said that lender losses could be 30 percent, or even more. When lenders foreclose on homes, they typically suffer losses that exceed 30 percent of the …	When lenders foreclose on homes, they typically suffer losses that exceed 30 percent of the value of the home," McCotter writes. We can't say if McCotter's plan would work, but we were curious if foreclosures meant lenders suffered "losses that exceed 30 percent of the value of the home." For one thing, the average sales price of foreclosures are running about 30 percent below the average sales p…	... (It) is clear that lenders share the interest of homeowners and their communities to avoid foreclosure." In ruling on McCotter's statement, we want to be clear that we found no definitive national studies on what lenders lose when they foreclose on homes. Industry estimates also put the number at 30 percent or higher.	1	2	3	1	2	3	1	2	3	1	2	3
9080.json	You can buy lobster with food stamps.	TRUE	So, food stamp recipients can purchase lobster. "They’re economizing and buying inexpensive cuts of meat, when with (food stamps) you can buy lobster." He’s been pilloried by some of the network’s commentators for what they describe as his carefree outlook on accepting federal benefits and purchasing luxury food. Electronic Benefits Transfer is the system that transfers the federal funds to food …	As the Fox News video showed, there is at least one person receiving those federal benefits who bought lobster. The man did say he does so if it’s on sale. From what we’ve seen, there are few people buying such high-end items. But it is possible, just as Morris said.	So, food stamp recipients can purchase lobster. Our bosses said lobster was not in the budget. "They’re economizing and buying inexpensive cuts of meat, when with (food stamps) you can buy lobster." So are there many other food stamp recipients buying lobster?	2	1	3	2	1	3	2	3	1	2	1	3
7552.json	Georgia loses millions of dollars of revenue because people go out of state to buy fireworks.	mostly-true	It’s probable, but there is no specific research to support his argument. We do know some Georgians go outside the state to buy fireworks, and it does seem like people spend millions of dollars on fireworks in other states. But based on the specific numbers we have from other states and our own estimates, he seems to be in the ballpark.	We lose millions of dollars of revenue because people go out of state to buy fireworks, said Mullis, a Republican from Chickamauga, a 10-minute trip from the Tennessee border. Indiana has about 6.5 million residents. A 6 percent tax or fee could be worth at least $3 million annually. Senate Resolution 378 would allow revenue from the sale of consumer fireworks to be used to help fund trauma care …	We lose millions of dollars of revenue because people go out of state to buy fireworks, said Mullis, a Republican from Chickamauga, a 10-minute trip from the Tennessee border. Revenue officials in Alabama, South Carolina and Tennessee said they did not have any research showing how much money Georgians spend on fireworks there. The newspaper reported the revenue collected was far below projection…	3	1	2	3	1	2	3	1	2	3	1	2
6121.json	(Assembly Democrats) wanted to raise the gas tax by $2.4 billion. We said no to that....Theyre down on the ground. Theyre sweating. Theyre twitching. Its ugly, cause I keep saying no.	barely-true	They wanted to raise the gas tax by $2.4 billion. They haven’t gotten to raise a tax in over 800 days. "Nobody seems willing to politically have that conversation." That’s what the Assembly Democrats would have gotten for you.	We said no to that." Now Democrats are "down on the ground. They’re sweating. They’re twitching. It’s ugly, ‘cause I keep saying no," Christie added. The governor’s right about there being a Democratic proposal to raise the motor fuels tax by about $2.4 billion, but Assembly Democratic leaders have stopped the bill from moving forward. Since its first introduction in May 2010, the bill has never …	They wanted to raise the gas tax by $2.4 billion. They haven’t gotten to raise a tax in over 800 days. The full Assembly has never voted on the proposal. As for Christie’s role in stopping such a tax hike, Drewniak added: "The Governor was emphatic many times amid this discussion by Democrats that he would not sign legislation increasing the gasoline tax and add a new tax burden on over-taxed New…	3	1	2	1	3	2	3	1	2	3	1	2
7356.json	Three in four low-income workers dont have any paid sick days available.	TRUE	It’s worse for low-income workers — three in four don’t have any paid sick days available." "Some 40 percent of private-sector workers in the U.S. don’t have any paid sick days at all. Brown's staff said the source was last year's National Compensation Survey from the U.S. Bureau of Labor Statistics. Among the lowest-paid 25 percent of workers, the chart shows that 29 percent have paid sick days,…	And a 2011 study in the American Journal of Public Health estimated that a lack of sick leave helped spread 5 million cases of flu-like illness during the outbreak of 2009. Critics of the sick leave initiative, including the National Association of Independent Businesses, the U.S. Chamber of Commerce and the Ohio Chamber of Commerce, say paid sick days add costs to low-margin businesses, are burd…	It’s worse for low-income workers — three in four don’t have any paid sick days available." "Some 40 percent of private-sector workers in the U.S. don’t have any paid sick days at all. More than three in four food service and hotel workers (78 percent) don’t have any paid sick days, according to an analysis by the Institute for Women's Policy Research. Among the lowest-paid 25 percent of workers,…	1	3	2	1	3	2	1	3	2	1	3	2
12141.json	The [Obama] administrations regulatory assault on coal-fired energy has put thousands of Americans out of work	barely-true	Blunt said: "The administration’s regulatory assault on coal-fired energy has put thousands of Americans out of work, and threatens to double utility costs for Missouri families by 2020." But we did find a study from the U.S. Environmental Information Administration that specifically breaks down how the Clean Power Plan will affect electrical utilities. That agency predicts electricity prices wil…	Blunt said: "The administration’s regulatory assault on coal-fired energy has put thousands of Americans out of work, and threatens to double utility costs for Missouri families by 2020." PolitiFact has reported on the Obama administration’s impact on the coal industry before and found coal has been losing to natural gas for a while now. "The single biggest factor in the decline of the coal secto…	Blunt said the Obama administration’s regulations have caused thousands of workers in the coal industry to lose their jobs. While the decline in coal industry employment is real, the role of administration policy is less certain. Experts note that competition from abundant, cheap natural gas has reduced the demand for coal more than any other factor. With less demand, the need for workers falls. …	3	1	2	3	1	2	3	1	2	3	1	2
531.json	George Bush, and a Republican Congress, have presided over a 55 percent increase in the size of domestic government spending in the last seven years.	mostly-true	This Republican president, George Bush, and a Republican Congress, have presided over a 55 percent increase in the size of domestic government spending in the last seven years, Fiorina said. Interestingly, Fiorina's claim is right on the money if you roll estimated spending for fiscal 2008 into the equation, which makes us wonder if she should tweak her talking points. And he has consistently spo…	This Republican president, George Bush, and a Republican Congress, have presided over a 55 percent increase in the size of domestic government spending in the last seven years, Fiorina said. While the definition of "domestic government spending" that Fiorina brought up is open to some interpretation, historical tables in the fiscal 2009 budget request that Bush issued in February 2008 demonstrate…	Bush's budget request estimates nondefense domestic spending will total $2.32-trillion in 2008. That's precisely a 55 percent increase from the $1.49-trillion it totaled in 2000. Either way, Fiorina's point is generally backed up by the numbers. Domestic spending did surge during the Bush years, along with every other broad category of government outlays.	3	1	2	3	2	1	3	2	1	3	1	2
12087.json	Our campaign depends on small donations for the majority of our support.	barely-true	Clinton said, "Our campaign depends on small donations for the majority of our support." https://www.sharethefacts.co/share/21481788-ce13-458b-a58f-b50a07734b1b	We wondered whether it's accurate to say that her campaign "depends on small donations for the majority of our support." So, compared with Sanders, Clinton has raised a smaller dollar total from small donors, and a smaller percentage of her individual contributions have come from from small donors. Consider the number Clinton cited — that she has 950,000 individual contributors. On the other hand…	We wondered whether it's accurate to say that her campaign "depends on small donations for the majority of our support." However, if a donor gives an amount less than $200, the campaign is not required to disclose the donor's name. Please, please join the 950,000 supporters who already have contributed, most less than $100, because our campaign depends on small donations for the majority of our s…	3	1	2	3	1	2	3	1	2	3	1	2
12798.json	Says Donald Trump and Mike Pence want to gamble with your retirement benefits in the stock market.	barely-true	Donald Trump and Mike Pence want to gamble with your retirement benefits in the stock market, Reid said. But does it apply to Trump and Pence? Mike Pence would roll back Democratic accomplishments and de-stabilize Social Security. Pence has strongly supported several attempts to modify Social Security, but it is an exaggeration to call it "gambling" with benefits in the stock market because the c…	Reid said Pence and Trump "want to gamble with your retirement benefits in the stock market." Pence may have a record of supporting Republican proposals to change Social Security to allow for more investment into private funds, but Trump has clearly and repeatedly said this campaign cycle he has no plans to modify Social Security or introduce elements similar to the Bush’s failed 2005 attempt to …	Donald Trump and Mike Pence want to gamble with your retirement benefits in the stock market, Reid said. But does it apply to Trump and Pence? "Republicans want to tear down the pillars of middle-class security." Mike Pence would roll back Democratic accomplishments and de-stabilize Social Security.	2	1	3	2	1	3	2	3	1	2	1	3
9316.json	Congress used earmarks for more than 200 years.	mostly-true	Reid said Congress has used earmarked spending for "more than 200 years." A credible case can be made that Congress engaged in something like earmarking as long ago as 1789 and 1817. The tactic wasn’t used extensively and consistently during that whole period, and it really exploded in the past 20 years, before being phased out more recently. Still, Reid has a point that legislators have long dir…	Keep in mind, that’s what the country has done for more than 200 years, except for the brief period of time in recent years that we haven’t done these. However, just because it was vetoed by the president doesn’t mean the measure can’t still be considered an earmark. So the earmark has a long history. Reid defended the practice by claiming earmarks are an American tradition.	However, just because it was vetoed by the president doesn’t mean the measure can’t still be considered an earmark. It is important to note that then-President James Madison vetoed Calhoun’s bill, arguing that Congress did not have the power to make such appropriations. "Keep in mind, that’s what the country has done for more than 200 years, except for the brief period of time in recent years tha…	1	2	2	1	2	2	1	2	2	1	2	2
7135.json	If you and I fail to defund ObamaCare now, some 16,000 new IRS agents will be begin prying into our private medical records, eyeing each and every one of our treatments and prescriptions for violations.	pants-fire	Among other things, Weber claimed that if the law is fully implemented, the federal government will hire 16,000 new IRS agents who "will begin prying into our private medical records, eyeing each and every one of our treatments and prescriptions for ‘violations.’ " We left e-mail and telephone messages for Weber with his organization, but weren’t able to reach him for comment. Despite two years o…	Among other things, Weber claimed that if the law is fully implemented, the federal government will hire 16,000 new IRS agents who "will begin prying into our private medical records, eyeing each and every one of our treatments and prescriptions for ‘violations.’ " We left e-mail and telephone messages for Weber with his organization, but weren’t able to reach him for comment. In a March 28, 2011…	There are not going to be any discussions about health coverage with an IRS employee. "The role of the IRS is going to be, again, the tax portions of this," he said, "not the health portions of this." Our Ruling Dan Weber, president of the Association of Mature American Citizens, said in a widely circulated letter that under the federal health overhaul, 16,000 new IRS agents will be "prying into …	2	1	3	2	3	1	2	1	3	1	2	3
7272.json	Social Security has nothing to do with the federal deficit.	barely-true	But the program has run a deficit each year since then and is taking money from its bonds to cover the gap. Federal officials are also worried about the long-term impact of future deficits on the program. Johnson has a reasonable argument since Social Security is taking money from its bond interest to pay to cover the current gap. But these gaps do have an impact on other parts of the federal bud…	The federal government takes a percentage of the pay of most workers for Social Security. Until 2010, that was true. Johnson wrote on Twitter: "#socialsecurity has nothing to do with the deficit -- why are we even talking about it?" To sum up, Johnson’s Twitter page said Social Security has nothing to do with the federal deficit.	The federal government takes a percentage of the pay of most workers for Social Security. Johnson wrote on Twitter: "#socialsecurity has nothing to do with the deficit -- why are we even talking about it?" Social Security and Medicare account for about one-third of federal spending. Boston University economics professor Laurence Kotnikoff told PolitiFact New Hampshire that Social Security is a pa…	1	3	2	1	2	3	3	1	2	1	3	2
5230.json	Right now in Georgia, nearly one in three leaving our prisons are re-convicted within three years.	TRUE	Right now in Georgia, nearly one in three leaving our prisons are re-convicted within three years. One in three are re-convicted within three years? During his second State of the State address earlier this month, Deal said Georgia has one of the biggest prison populations in the nation. The recidivism rate within three years for state prisons, where the largest percentage of Georgia prisoners is…	Right now in Georgia, nearly one in three leaving our prisons are re-convicted within three years. One in three are re-convicted within three years? The Georgia Department of Corrections website’s most recent data is through fiscal year 2008. Those numbers seemed dated, so PolitiFact Georgia searched for some more recent information.	The Pew report on recidivism is more than one-third, which helps any argument that Deal would make that his statement is correct. The most recent state data shows the recidivism rate is slightly less than one-third. The governor said in his speech that the rate was "nearly" one in three. We believe all of the numbers we saw support his statement.	1	3	2	3	2	1	1	3	2	1	3	2
12179.json	Evidence shows Zika virus turns fetus brains to liquid.	pants-fire	The Weekly Observer and other websites said that researchers had found that the Zika virus turned a fetal brain into liquid. The Observer referred to a study in the New England Journal of Medicine. They found signs of dead brain cells and cerebrospinal fluid where it shouldn’t be. They never said that the virus liquefied brain cells. Update (April 5, 2016): After we published, we heard from the s…	Evidence Shows Zika Virus Turns Fetus Brains to Liquid blared the headline on the website Weekly Observer, which is based in England. A recent study published by the New England Journal of Medicine shows that the Zika virus kills developing fetal brain cells. In a (sic) recent research published in the New England Journal of Medicine, the researchers tracked the development of a foetus whose moth…	Evidence Shows Zika Virus Turns Fetus Brains to Liquid blared the headline on the website Weekly Observer, which is based in England. At 21 weeks the woman aborted the foetus. But did the researchers say that the brain had been liquefied? In this case, the brain was small but the head was still within the normal range.	1	2	3	3	2	1	3	2	1	1	2	3
7111.json	Says the initial Portland plastic bag ban represented only a modest share of total single-use checkout bag use.	barely-true	The policy reduced single-use plastic shopping bag consumption, but this initial scope represents only a modest share of total single-use checkout bag use." Obviously as you decrease the number of outlets that use plastic bags, the number of bags being used will decrease." Brooks reiterated that we had misread the ordinance -- though she conceded it could have been clearer -- and that it was refe…	The policy reduced single-use plastic shopping bag consumption, but this initial scope represents only a modest share of total single-use checkout bag use." Obviously as you decrease the number of outlets that use plastic bags, the number of bags being used will decrease." The term "modest share" is referring to the number of outlets required to ban single use bag usage in the original scope, whi…	He said it was probably safe to say that the initial ordinance targeted "a third of the volume --- but again, I caution the numbers.") We understand that the mayor’s office may not have intended to mean plastic bag usage, but it read that way to us -- and likely many others. Words matter.
9524.json	When asked by a reporter whether hes at the center of a criminal scheme to violate campaign laws, Gov. Scott Walker nodded yes.	pants-fire	Scott Walker helped run a "criminal scheme" to violate campaign laws, the Democratic Party of Wisconsin posted a web video. Benson, not shown at first, is heard saying to Walker: "...that you are the center of a criminal scheme. Neither wanted to comment on the Dem video. Tate referred us to party spokeswoman Melissa Baldauff, who acknowledged that it appears Walker shakes his head yes in the par…	A Democratic Party web video making the rounds on social media shows a grim-faced Gov. Scott Walker appearing to bob his head yes to a reporter’s question about whether he was at the center of a "criminal scheme" to evade campaign finance laws.	We asked Democratic Party of Wisconsin chairman Mike Tate about the discrepancy between the two videos. Scott Walker helped run a "criminal scheme" to violate campaign laws, the Democratic Party of Wisconsin posted a web video. It doesn’t take a degree in YouTube to see that Walker actually bobbed his head "yes" during Benson’s question, not in response to Benson. are false."	1	3	2	2	3	1	3	1	2	1	3	2
5403.json	Other states have considered or have sunset advisory commissions; the federal government has the ability, too.	mostly-true	Does the federal government have such a commission itself? But it’s not accurate to suggest that the federal government has an oversight commission. "Other states have. In a remonstrance -- otherwise known as an expression of protest or complaint -- he said that such a committee would strengthen the legislative body.	The ability to review specific spending every few years isn’t the same thing as a broad-based commission with the power to kill agencies. Starr acknowledged as much in an interview with PolitiFact Oregon. His language on the floor was a little foggy and he clarified his comments in an interview. We don’t find this to be a significant piece of missing information, but feel readers should know the …	We’re not going to weigh in on whether the idea has merit. Majority Democrats in the Senate voted down Starr’s motion without discussion, but the questions for PolitiFact Oregon remained. He also clarified that the federal government does not have one commission overseeing multiple agencies, but that Congress regularly reviews certain spending provisions. In a follow-up interview, Starr said he g…	3	2	1	3	1	2	1	2	3	3	1	2
2491.json	Pepper ... kicked off a jock tax, imposing a levy on the sports and entertainment industry.	TRUE	Pepper also kicked off a jock tax, imposing a levy on the sports and entertainment industry, according to a video Yost’s campaign produced in August. He also is a former chairman of the Ohio State Bar Association’s taxation committee. It pointed to legislation Pepper sponsored as a city councilman in 2002 that called on Cincinnati to begin collecting income taxes from visiting professional athlet…	The story did not mention Pepper or the city of Cincinnati. However, Pepper’s legislation, while beneficial to the city budget, did institute the tax collection in Cincinnati. And the experts we talked to said collecting the tax was the city’s prerogative. Pepper can’t duck responsibility for starting the tax in Cincinnati.	Pepper also kicked off a jock tax, imposing a levy on the sports and entertainment industry, according to a video Yost’s campaign produced in August. It is true that Pepper did not create the jock tax: It was collected in other cities before he pushed for it in Cincinnati. (To be clear, the state auditor cannot levy taxes.) But Cincinnati was far from the first city to collect a jock tax.	1	2	3	2	1	3	2	1	3	2	1	3
11562.json	The Trans-Pacific Partnership was designed for China to come in, as they always do, through the back door and totally take advantage of everyone.	pants-fire	Not only is China not a part of the TPP, but the experts we talked to all agreed: The TPP isn’t exciting news for China. There’s a chance that China could join the TPP down the line, but not without robust changes to its economy. Until then, China doesn’t stand to gain much from having trade diverted to other countries. Trump can’t blame everything on China.	It's a deal that was designed for China to come in, as they always do, through the back door and totally take advantage of everyone. We should also note that the TPP actually does mention currency manipulation. "The TPP is horrible deal," Trump said. "And if you look at the way they take advantage, it's through currency manipulation.	It's a deal that was designed for China to come in, as they always do, through the back door and totally take advantage of everyone. However, that may be entirely offset by the greater level of economic activity that we should expect to see in the TPP member countries." To give Trump the benefit of the doubt, we asked some experts if there is any way China could benefit "through the back door" fr…	1	3	2	1	3	2	3	2	1	1	3	2
10516.json	Austin has more lobbyists working for it than any other municipality in Texas.	mostly-true	Claunch went on to say: "Austin has more lobbyists working for it than any other municipality in Texas, mostly because they are frequently a target of the Legislature." Similarly, a City of San Antonio official said by phone the number of lobbyists shown in state filings as representing that city do not reflect the lobbyists he regularly consults. John Hrncir, a citygovernmental relations officer…	Claunch said:"Austin has more lobbyists working for it than any other municipality in Texas." In 2014, indeed, Austin had more lobbyists (22) representing its interests before state government than any other Texas city and also was expected to spend more on such lobbyists than a few other cities identified as clients by multiple lobbyists. But lobbyist filings with the state don’t reveal how much…	Claunch went on to say: "Austin has more lobbyists working for it than any other municipality in Texas, mostly because they are frequently a target of the Legislature." John Hrncir, a citygovernmental relations officer, told us that even though 22 people were listed as lobbying for the city in 2014, he directly consulted with less than half that many. Is Austin No. Similarly, a City of San Antoni…	2	1	3	3	1	2	1	3	2	2	1	3
7195.json	Says Charlie Crist and Missouri Rep. Todd Akin hold same abortion views. No exception except the life of the mother.	barely-true	In this case, Curry said, "Todd Akin & @charliecristfl hold same abortion views. No exception except the life of the mother." But even RPOF acknowledges that Crist's exceptions go beyond the life of the mother to include rape and incest. And RPOF ignores Crist’s words and actions that would conflict with Akin’s stances -- such as when Crist called himself "pro-choice."	In 1992 when he was running for the state Legislature, the Miami Herald wrote that Crist said he was "pro-choice" but opposed state-funded abortion. No exception except the life of the mother. Curry tweeted about Crist: "BTW, he holds the same position as Akin on abortion." But here we wanted to check to see if Curry was correct to claim that Akin and Crist hold identical positions on abortion, t…	During his 2006 campaign, he told a priest that if elected he’d sign an abortion ban similar to South Dakota’s which only included an exception for the life of the mother. But here we wanted to check to see if Curry was correct to claim that Akin and Crist hold identical positions on abortion, that they are opposed except when the life of the mother is in jeopardy. We will borrow in part from pre…	3	1	2	2	1	3	1	3	2	3	1	2
2316.json	Florida is enjoying its lowest crime rate in 39 years.	mostly-true	Due to these important policies and laws, Florida is enjoying its lowest crime rate in 39 years. For this Truth-O-Meter we wanted to explore whether the state's crime rate is the lowest it has been in 39 years. We turned to the Florida Department of Law Enforcement, which issued a press release on April 7, 2010, stating in the headline "Governor Crist announces lowest crime rate in 39 years." We …	Kenney said it's possible to argue that the auditing procedures today are better than in the past but still "yes they can cheat." He's right on the math that the state's crime rate in 2009 was lower than it was in 1971. But Crist omits that it had dropped below the 1971 rate before he became governor and that the rate went up his first two years in office.	Due to these important policies and laws, Florida is enjoying its lowest crime rate in 39 years. For this Truth-O-Meter we wanted to explore whether the state's crime rate is the lowest it has been in 39 years. We turned to the Florida Department of Law Enforcement, which issued a press release on April 7, 2010, stating in the headline "Governor Crist announces lowest crime rate in 39 years." In …	3	1	2	3	1	2	1	3	2	3	1	2
4289.json	Says of the 2,000 Portland households in the year-long (composting) pilot, 87 percent of participants reported being satisfied with the overall system.	half-true	So 20 percent is representative. But, he said, the statements on the city’s website were still accurate. Indeed, a 20 percent response rate to a mail survey is on the high end, said Elway. But he’s not entirely right.	About 2,000 households have been doing this since May 2010 as part of a pilot program. The statement makes it sound as though all 2,000 pilot homes responded and that, of them, 87 percent liked the program. "It’s sophisticated, it’s accurate, it’s demographically diverse. The City Council is set to vote on the proposal in the next week or so with the goal of getting the whole city composting by t…	But if I were the client looking at this, I would look at the positive number I got back with squinty eyes. So where does all this leave us? Well, we’re not sold that the satisfaction rate is as high as 87 percent, given the survey design and the way the sample was collected. But, it does seem obvious that, among the pilot homes, the program is relatively popular.	3	1	2	3	2	1	1	3	2	3	1	2
63.json	We're spending $1.6 billion for all of Latin America in terms of aid and assistance, a fraction of what we're spending in Iraq, the $500 billion we've spent there	mostly-true	The amount he refers to is what has been requested by the administration for the upcoming fiscal year, subject to adjustments by Congress. Estimates vary on the precise amount spent since the 2003 invasion, but two of the most credible sources, the Congressional Research Service and the Congressional Budget Office, give the total as approximately $450 billion and $413 billion, respectively. Thus,…	Dodd's assertion that foreign aid spending on Latin America stands at $1.6 billion dollars is accurate, albeit with the caveat that the money has yet to be appropriated.	Dodd's assertion that foreign aid spending on Latin America stands at $1.6 billion dollars is accurate, albeit with the caveat that the money has yet to be appropriated.	1	2	2	2	1	1	2	1	1	1	2	2
13155.json	Says Ron Johnson helped companies ship jobs overseas.	FALSE	Citing Johnson’s votes for free trade agreements with South Korea, Panama and Colombia, Feingold says Ron Johnson "helped companies ship jobs overseas." There are estimates that the largest of the three deals, with South Korea, resulted in a loss of jobs in the United States. But those estimates are disputed, largely because of how difficult it is to isolate one cause for changes in employment. M…	One looks at the camera and says Johnson "helped companies ship jobs overseas." But, importantly for this fact check, his report did not say that jobs lost in the United States were sent overseas. Scott told us that the Korean trade deal led to an increased demand in the United States for products made in Korea and a decreased demand for U.S.-made products. They were in favor of free trade deals …	One looks at the camera and says Johnson "helped companies ship jobs overseas." The South Korea deal is the second-largest. But that report did not state that U.S. jobs were sent overseas, either. Moreover, there are issues with the two job-loss estimates attributed to the Korean trade deal.	1	2	3	2	3	1	3	2	1	1	2	3

## Sheet: task 2
id	claim	justification	class 2-way	class 6-way
2568.json	On implementing a sales tax. Doug Ainge once argued forcefully for a sales tax; now he says ‘No Sales Tax. No Way.’	We’re not so sure that an entire opinion piece in the state’s largest newspaper on the merits of a sales tax is cherry-picking, but that’s really neither here nor there. Ainge has gone from arguing for a sales tax (Disneyland doesn’t suffer) to saying he’d vote against one ("No sales tax. No way."). At PolitiFact Oregon, we call that a Full Flop. Comment on this item.	TRUE	mostly-true		- binary: true, false, insufficient
13155.json	Says Ron Johnson helped companies ship jobs overseas.	Citing Johnson’s votes for free trade agreements with South Korea, Panama and Colombia, Feingold says Ron Johnson "helped companies ship jobs overseas." There are estimates that the largest of the three deals, with South Korea, resulted in a loss of jobs in the United States. But those estimates are disputed, largely because of how difficult it is to isolate one cause for changes in employment. M…	TRUE	mostly-true		- 6-way: pants-fire, barely-true, half-true, mostly-true, false, true, insufficient
11923.json	Says she will work to raise the federal minimum wage back to the highest level its ever been $12 an hour in todays dollars.	Clinton said she will "work to raise the federal minimum wage back to the highest level it’s ever been — $12 an hour in today’s dollars." The minimum wage has never previously been "$12 an hour in today’s dollars" -- it’s gone as high as $10.69 an hour. However, Clinton has a point using other economic data. The data suggests that a $12 minimum wage would be similar to the 1968 wage when compared…	TRUE	half-true
11025.json	Six thousand people have sought addiction treatment through expanded Medicaid.	Our ruling In her state of the state address, Hassan said that "6,000 people have already accessed services for substance misuse" through the state’s Medicaid program. There is no question that substance abuse in the state is a real and pressing problem, and the statistics show that thousands have sought help as a result of the state’s expanded Medicaid program. But Hassan offered (and later corr…	TRUE	half-true
10085.json	All four on Mount Rushmore, they were all independents at one critical point in their career.	Pressler, an independent, said, "All four on Mount Rushmore, they were independents at one point in their career." It would be an effective campaign pitch, particularly in the home state of the iconic monument, but alas, it’s rubble. Of the four, Washington is probably the one with the most independent bona fides. You can perhaps make the case Jefferson was an independent "at one point" very earl…	FALSE	FALSE
9622.json	More women are graduating from college now than men.	McConnell said that "more women are graduating college now than men." We found that since the early 1990s, women have earned more postsecondary degrees than men -- and in the 2011-12 academic year, women earned more degrees of all types -- bachelor’s, master’s and doctoral -- than men did.	TRUE	TRUE
7834.json	Nothing in the Constitution explicitly guarantees our right to vote.	Acknowledging that the right to vote is inherent in the Constitution, Pocan nevertheless called for amending the document and declared: "Nothing in the Constitution explicitly guarantees our right to vote." Whether adding such a guarantee would have much impact is debatable.	TRUE	TRUE
2205.json	About 106,000 soldiers had a prescription of three weeks or more for pain, depression or anxiety medication.	Unannounced health and welfare checks and inspections "have been lost" as part of that transition. "There are instances where a leader’s lack of Soldier accountability resulted in suicide victims not being found until they had been dead for three or four weeks," the report noted. While the report raises a host of issues, we're only ruling on what the general said about the rate of medication amon…	TRUE	mostly-true
8606.json	Republicans have proposed dozens of (health care) solutions designed to help control costs and improve quality.	Johnson said, "Republicans have proposed dozens of solutions designed to help control costs and improve quality" of health care in the United States.Republicans have circulated quite a few bills and ideas over the years, but there is almost nothing in most of the GOP proposals that directly addresses quality of care. As far as costs, most of the proposals have winners and losers. Some of the bill…	TRUE	TRUE
575.json	John McCain intervened, which helped Airbus get that Pentagon contract.	Some would say two letters arguing against subsidy disputes not being included in the bid competition constitutes intervening. But to imply those letters swung the contract in Airbus' favor overstates McCain's influence.	TRUE	half-true
4425.json	Since the beginning of the year weve created a net increase of 45,000 jobs.	There hasn’t been enough time for them to kick in, they say. Standard & Poors cited Ohio’s balanced budget as having a positive impact, but that didn’t happen until the end of June. Ohio has registered job growth since early last year, well before Kasich was elected. And while his efforts have received some positive reviews, there are many factors beyond the governor’s office that impact job grow…	TRUE	half-true
2720.json	Says state Senate candidate Monk Elmer voted to exceed the (school district property tax) spending caps.	1,637 out of 2,000, and 27th of the 32 state schools on the list.) Let’s conclude with an obvious geography lesson: In a key state Senate race, the American Federation for Children reached for a great headline and issue to use against Democratic candidate Monk Elmer.	insufficent	insufficent
11083.json	Says Bill and Hillary Clinton attended Donald Trumps last wedding.	Curbelo said Bill and Hillary Clinton were at Donald Trump's last wedding. Bill Clinton only made the reception, but Hillary Clinton did have a seat in the first row at the church in 2005. Both rubbed elbows with the stars at the reception.	TRUE	TRUE
6900.json	Says shes never said dont build Texas 45 Southwest.	As far as we can tell, there’s no instance of Huber being so blunt.	TRUE	mostly-true
7271.json	It costs $10,000 a year to keep a child in school; it costs $30,000 a year to keep someone in prison.	Kitzhaber, in his State of the State speech, implored lawmakers to work with him to boost spending for children and families, including more money into classrooms. As part of that initiative, he proposed lowering costs in health care and in prisons, as well as taking a hard look at tax expenditures and public pension reform. He asked lawmakers to keep two numbers in mind: $10,000 to keep a child …	TRUE	TRUE
1005.json	Obama used $20 million in federal money to emmigrate (sic) Hamas Refugees to the USA.	Nevertheless, the following day, Kyl withdrew the amendment after receiving a letter from the Department of State, which he entered into the Senate record. The letter, from Michael C. Polt, acting assistant secretary of state, states that the $20.3 million drawn from the Emergency Refugee and Migration Assistance Fund (ERMA) "will be used to provide humanitarian assistance to Palestinian refugees…	FALSE	FALSE
4161.json	Active duty males in the military are twice as likely to develop prostate cancer than their civilian counterparts.	However, that same research doesn’t conclude that military members are twice as likely to "develop" prostate cancer as Stearns said. The study hypothesizes that one reason for the different diagnosis rate may be because military members are subject to more frequent health screenings. Getting to the bottom of the discrepancy is actually why Stearns requested the money. That’s a needed clarificatio…	TRUE	half-true
1873.json	Presidents Hoover, Truman and Eisenhower collectively ordered the deportation of at least 15 million illegal aliens.	The official total from 1930 to 1960 is 477,000 formal removals and 5.4 million who left voluntarily. That 30-year period includes the entirety of Roosevelt's terms, not just the three presidents cited in the e-mail.	FALSE	FALSE
656.json	There's only four senators senior to me ... there's still 44 older than me.	(69), Tom Harkin, D-Iowa (68), Harry Reid, D-Nev. (68), Patrick Leahy, D-Vt. (68), Lamar Alexander, R-Tenn. (68), Barbara Boxer, D-Calif. (67), Ben Nelson, D-Neb. (67), Bernie Sanders, I-Vt. (66), Max Baucus, D-Mont. (66), Mitch McConnell, R-Ky. (66), Joe Lieberman, I-Conn. (66), Jon Kyl, R-Ariz. (66), Byron Dorgan, D-N.D. (66) and Bill Nelson, D-Fla. (66 as of Sept. 29, 2008). But this is all re…	insufficent	insufficent
6684.json	This would be the largest casino in the United States.	Especially when they have called a press conference to counter deceptive campaigning by the other side. Her revised statement that the proposed casino would be the second largest in the country isn’t even close to accurate either. That shows a reckless disregard for accuracy.	FALSE	pants-fire
2149.json	Warren Buffett called (Jeff) Greenes scheme financial weapons of mass destruction.	Still, there's no doubt Greene was heavily involved in buying credit default swaps, which are a type of derivative. And Buffett was exceptionally critical of derivatives. The problem with Meek's ad is that it gives the impression that Buffett criticized Greene personally, which he didn't do. By saying Buffett called Greene's scheme a bad idea, Meek personalizes a comment that had nothing to do wi…	FALSE	FALSE
7877.json	Black children constitute 18 percent of the nations public school population but 40 percent of the children who are suspended or expelled.	About 20 percent of the students suspended were Hispanic. Black students made up about 38 percent of expulsions in one category and 42.5 percent of expulsions in another category, the 2006 report showed. Our conclusion: Lewis co-wrote that black students make up 18 percent of the students in America’s public schools but 40 percent of students who are suspended or expelled. The percentage of the U…	TRUE	mostly-true
1061.json	The war spending bill actually spends more money on the International Monetary Fund than on the war.	But he's right that there's a potential for the U.S. Treasury, over time, to give the IMF quite a chunk of change as a result of the line of credit.	TRUE	mostly-true
11639.json	It is already in the law that there is a requirement to screen (refugees) for religion.	Bush said that there is a legal requirement to screen for religion. U.S. immigration law does state that American officials must dig into a person’s religion if their refugee status is based on a fear of religious persecution. In practice, questions about religion are common even if they are not required. His statement is accurate but needs clarification.	TRUE	TRUE
7838.json	Says the word Dhimmitude is on page 107 of the health care law and means Muslims are specifically exempted from the government mandate to purchase insurance.	Muslims are not specifically exempted. And if anyone is exempted, it’s a small number of Christian groups. https://www.sharethefacts.co/share/c1619e80-19f5-4804-a3c6-94a8a875f051	FALSE	FALSE
4400.json	Says Jon Huntsman supports changes in Medicare that would deny guaranteed benefits to 980,000 New Hampshire residents.	The New Hampshire Democratic Party Chair said Huntsman supports a GOP Medicare plan that would deny guaranteed benefits to 980,000 Granite Staters. He’s right about Huntsman's position and the number of New Hampshire residents that would be affected. But he ignores that there is the possibility that the current benefits could be trimmed and he is exaggerating the facts about the Ryan plan. Many d…	TRUE	half-true
10517.json	Ninety-six percent of failing schools are spending above $8,400, the average annual per student expenditure, and 26 percent spend considerably more than that.	His statement doesn’t point out that the failing schools are likely spending more money because they are receiving more money as a result of having high concentrations of students from low-income families. It could be argued that the money they receive and spend isn’t working -- afterall, they are failing schools by the state’s current measure of success, the CCRPI index. Or it could be said that…	TRUE	mostly-true
2717.json	Of the more than 1.3 million temporary mortgage modifications, over half have defaulted.	In the final full week of the U.S. Senate race, how did Rubio fare on his numbers about the mortgage modification program? Rubio said "over 1.3 million temporary work-outs, over half have now defaulted,'' referring to a temporary mortgage modification program.	insufficent	insufficent
814.json	The race will tighten, just because that's what happens at the end of campaigns. They always have.	(Gore briefly polled better than Bush in 2000, but that was for just one out of the last 21 days. Similarly, Carter polled better than Reagan in 1980, but for only three out of the last 21 days.) But we're not in the prediction business, we're in the fact business. And the fact is, 14 out of the last 16 elections have tightened in the final few weeks of the campaign.	TRUE	TRUE
8979.json	Says Tom Cottons vote in Congress to change Medicare will increase out-of-pocket expenses for every senior in Arkansas.	Pryor’s campaign ad said, "Cotton voted in Congress to change Medicare into a voucher system that will increase out-of-pocket expenses for every senior in Arkansas." Cotton did vote for a voucher-like system under two different budget proposals. The research isn’t conclusive, and we can’t predict the future. But even the voucher proposals go out of their way to leave current Medicare beneficiarie…	TRUE	mostly-true
6264.json	Because of the health care act, The people who have health care and like it in this county are not going to be able to keep what they have.	Cantor said that because of the health care law, "The people who have health care and like it in this country are not going to be able to keep what they have." His statement suggests that losing the health insurance you like is guaranteed by the law. His office cites the bleakest of nine scenarios in Deloitte studies, under which 42 percent of workers would lose their company insurance. The Canto…	TRUE	barely-true
6774.json	Bill Nelson voted to confirm Sonia Sotomayor, who signed a Supreme Court opinion saying Americans do not have an individual right to own firearms.	The NRA is correct in saying Nelson voted to confirm Sonia Sotomayor as an associate justice of the Supreme Court. And many experts see the group’s assertion that she signed an opinion "saying Americans do not have an individual right to own firearms" as fair. We heard lots of agreement from experts about this characterization, though two advocates of gun control said it is over-simplified. Gun-c…	TRUE	mostly-true
13324.json	Ford is moving all of their small-car production to Mexico.	Trump said that "Ford is moving all of their small-car production to Mexico." That’s correct as far as it goes, but framing it that way ignores an important qualifier -- that no U.S. jobs will be lost in the transition. The company says that workers at the Ford plant in question will instead make SUVs and pickups. https://www.sharethefacts.co/share/0f5ed3db-289b-4d1c-a1d6-4c03ac61e82e	TRUE	mostly-true
2514.json	The federal government can tell General Motors what to charge for its automobiles.	"It's easy to overstate how overinterventionist the government is being," Zaring said. There's no written language in the GM contract with the federal government that states Uncle Sam has any control over vehicle pricing. The board has not gotten involved in such matters, according to GM and others who have paid attention.	FALSE	FALSE
12943.json	Under Hillary Clintons plan illegal immigrants convicted of committing crimes get to stay.	Trump says "In Hillary Clinton’s America ... illegal immigrants convicted of committing crimes get to stay." The tone of the ad is to scare voters into thinking that Clinton would welcome convicted criminals to remain in the country illegally, and that’s an exaggeration. Clinton has said that she will deport "violent criminals" as well as anyone who threatens our safety. She hasn’t been more spec…	TRUE	half-true
7904.json	Says the success of his economic agenda is supported by the fact we went from unemployment at 9.2 percent when I decided to run for governor four years ago to two points lower.	Walker said the success of his agenda is supported by the fact that "we went from unemployment at 9.2 percent when I decided to run for governor four years ago to two points lower." Walker’s numbers are on target if you go back "four years." But he muddies the waters by describing that as when he "decided to run" -- and that skews the picture when it comes to improvement. His decision came at an …	TRUE	mostly-true
8576.json	Nearly 20% of our residents are born abroad.	A City of Austin official said, "Nearly 20 percent of our residents" are born abroad. Such residents made up 19.3 percent of the city’s population in the 2007-11 period covered by a federal survey. Click here for more on the six PolitiFact ratings and how we select facts to check.	TRUE	TRUE
2445.json	Its not true that since hes been the president, executions in Iran have increased by four times.	And, while even the human rights groups acknowledge their numbers are imprecise (and likely under-reported), the same method for gathering the data has been used for years. That seems the best way, under the circumstances, to establish a trend.	TRUE	half-true
2852.json	More than 10 years of free trade has brought a $2 billion per day trade deficit.	Yet even if we were to put those numbers aside and only use the Commerce Department numbers, Brown’s figures were close to the mark before the recession. This year is not the best year to measure the normal effects of trade, and no one can predict the future; perhaps the trade deficit will stabilize at a lower number such as $500 billion a year, or $1.36 billion a day. Perhaps it won’t.	TRUE	TRUE
11917.json	North Koreas missiles are not going to have a capability to reach the United States anytime real soon.	McCain said of North Korea’s missile program, "They’re not going to have a capability to reach the United States anytime real soon, but it is inevitable over time they will." His statement is a bit of a generalization, but he’s right. North Korea may have the missile technology -- and range -- to strike the United States, but it hasn’t been tested. Experts on missile technology agreed with McCain.	TRUE	mostly-true
7334.json	Says his budget provides the highest state funding level in history for education.	Scott said his budget "includes $10.7 billion in state funding for Florida K-12 schools, the highest state funding level in history." Floridians hearing this statement might think that means education funding for Florida schools has never been higher. That's not the case. Actually, Scott is referring only to the state government's specific contribution to overall spending. Scott drums up the stat…	FALSE	FALSE
9891.json	Saturday Night Live executive producer Lorne Michaels could be put in jail under this amendment for making fun of any politician.	Cruz said that "Lorne Michaels could be put in jail under this amendment for making fun of any politician." Most experts we talked to agreed that the proposed amendment’s language left open the door to that possibility. But many of those same experts emphasized that prosecuting, much less imprisoning, a comedian for purely political speech would run counter to centuries of American tradition, and…	FALSE	barely-true
6945.json	Sherrod Brown supported President Obamas $453 billion tax increase.	A review of the legislation by the non-partisan CBO identified $272 billion in tax relief for individuals and businesses, with tax cuts for businesses that hire new employees. The vote that the ad cites was not a vote on passage of the legislation, but rather a procedural vote to open debate. The legislation never became law.	FALSE	FALSE
3455.json	The coalition of Arab states against Libyas Moammar Gadhafi is the biggest coalition against a fellow Arab leader since the Persian Gulf War in 1990-1991.	But they didn’t, and now they have. And I wouldn’t say that’s trivial." Stephen McInerney, executive director of the Project on Middle East Democracy, agreed, saying that the difference between the lack of Arab support for the Iraq War and the support for the situation in Libya is "extremely significant." The full history of this episode remains to be written.
13423.json	The media never show crowds.	Trump said that the media "never show crowds" at his rallies. The media has documented Trump’s crowds through stories, social media, photos and videos. https://www.sharethefacts.co/share/47dcbd66-e130-4850-9aa6-01a1e236246b	FALSE	pants-fire
1892.json	The House has never failed to pass a budget in the modern era.	For fiscal year 2003, the Senate, then under Democratic control, failed to pass a budget resolution of any kind, and on three other occasions (fiscal years 1999, 2005 and 2007) the House and Senate failed to reconcile their different bills and pass a compromise measure. Because Congress always works on the budget resolution for the coming fiscal year, the Republican Congressional majority failed …	TRUE	half-true
12728.json	Our economy is not growing.	Scott said, "Our economy is not growing." The GDP has grown between 1.5 and 2.5 percent each year since 2010. https://www.sharethefacts.co/share/c5eac01a-ba69-47a7-a778-3f79a143f472	FALSE	FALSE
6858.json	Says opponent U.S. Rep. Gwen Moore is Wisconsins most absent member of Congress, missing nearly 17 percent of the House votes in the second quarter of 2012.	Sebring says Moore is the state’s "most absent" member of Congress and that she missed 17 percent of the House votes in the second quarter of 2012. Indeed, Moore missed nearly 17 percent of the votes in the second quarter. That is Moore’s worst quarter, but it also amounts to Sebring doing some cherry-picking of data. A longer period shows a lower percentage, but even that places Moore at the top…	TRUE	half-true
11865.json	Gene Green is the NRAs favorite Democrat in Congress. ... Its no wonder the congressman has a lifetime A rating from the NRA.	Adrian Garcia said that his competitor in the Democratic race for Texas’ 29th district, Rep. Gene Green, has a "lifetime A rating" from the NRA and is the NRA’s "favorite Democrat in Congress." Green has certainly been a strong supporter of gun rights over his 23 years in the House. The gun control measures Green’s campaign pointed out that he supported were part of packages like the 1994 crime b…	TRUE	half-true
7994.json	Says Texas has more than 80,000 abortions each year.	Stickland said there are "80,000+" abortions each year in Texas.	insufficent	insufficent
3541.json	Across the United States, 25 percent of voting age African Americans do not have the photo ID that this bill would require.	Budish was using the national statistic to argue that the new law would disproportionately impact potential black voters in Ohio. Yet there has been no study of this issue in Ohio so there are no specific figures for the state population. ID rates in other states where studies were done differed greatly. So while Budish’s statement is accurate, it leaves out those important details needed to unde…	TRUE	half-true
6745.json	Says Barack Obamas comments indicate he believes in redistribution of wealth.	Obama was even critical of some government agencies in Chicago in the clip. Obama also spoke about ways to foster competition and innovation. Obama spoke of redistribution in a way that government can create an even playing field for everyone and encourage competition. The clip of the 1998 audio that Romney referenced to criticize Obama doesn’t tell the complete story.	TRUE	mostly-true
9052.json	Dan Patrick called for increasing the gas tax and the state sales tax.	Dewhurst said Patrick "called for increasing the gas tax and the state sales tax." Patrick piped up once for regular gas tax increases, in a 2009 talk, also making it clear that related revenue should pay for transportation projects. Finally, Patrick has not made increasing either tax a theme of his campaign for lieutenant governor. Click here formore on the six PolitiFact ratings and how we sele…	TRUE	TRUE
10799.json	After laying off 30,000 people,Carly Fiorina said that in retrospect, I would have done them all faster.	While the number is accurate -- acknowledged in a 2006 interview by Fiorina -- the comment that "I would have done them all faster" is pulled out of context. In fact, Fiorina was more specifically referring to her decisions to force out a small number of top-level executives, not tens of thousands of rank-and-file employees.	TRUE	half-true
6207.json	Says our 12 month job increase was the sixth highest in the nation.	The percentage increase of nearly 1.6 percent leaves the state in 13th place. To comment on this ruling, go to NJ.com.	FALSE	FALSE
13184.json	Says Tim Kaine actually tried to raise taxes by about $4 billion.	Pence said that when Kaine was governor, "He actually tried to raise taxes by about $4 billion." Pence was referring to three unsuccessful tax hikes proposed by Kaine. Two of them, in 2006 and 2008, were for transportation. The third, in 2009, was to raise general funds for the state. Added up, they come to $4 billion in proposed tax hikes and fees. There’s a couple of issues, however. Kaine’s 20…	TRUE	barely-true
4323.json	When lenders foreclose on homes, they typically suffer losses that exceed 30 percent of the value of the home.	... (It) is clear that lenders share the interest of homeowners and their communities to avoid foreclosure." In ruling on McCotter's statement, we want to be clear that we found no definitive national studies on what lenders lose when they foreclose on homes. Industry estimates also put the number at 30 percent or higher.	TRUE	TRUE
9080.json	You can buy lobster with food stamps.	As the Fox News video showed, there is at least one person receiving those federal benefits who bought lobster. The man did say he does so if it’s on sale. From what we’ve seen, there are few people buying such high-end items. But it is possible, just as Morris said.	TRUE	TRUE
7552.json	Georgia loses millions of dollars of revenue because people go out of state to buy fireworks.	It’s probable, but there is no specific research to support his argument. We do know some Georgians go outside the state to buy fireworks, and it does seem like people spend millions of dollars on fireworks in other states. But based on the specific numbers we have from other states and our own estimates, he seems to be in the ballpark.	TRUE	mostly-true
6121.json	(Assembly Democrats) wanted to raise the gas tax by $2.4 billion. We said no to that....Theyre down on the ground. Theyre sweating. Theyre twitching. Its ugly, cause I keep saying no.	We said no to that." Now Democrats are "down on the ground. They’re sweating. They’re twitching. It’s ugly, ‘cause I keep saying no," Christie added. The governor’s right about there being a Democratic proposal to raise the motor fuels tax by about $2.4 billion, but Assembly Democratic leaders have stopped the bill from moving forward. Since its first introduction in May 2010, the bill has never …	TRUE	TRUE
7356.json	Three in four low-income workers dont have any paid sick days available.	And a 2011 study in the American Journal of Public Health estimated that a lack of sick leave helped spread 5 million cases of flu-like illness during the outbreak of 2009. Critics of the sick leave initiative, including the National Association of Independent Businesses, the U.S. Chamber of Commerce and the Ohio Chamber of Commerce, say paid sick days add costs to low-margin businesses, are burd…	TRUE	TRUE
12141.json	The [Obama] administrations regulatory assault on coal-fired energy has put thousands of Americans out of work	Blunt said the Obama administration’s regulations have caused thousands of workers in the coal industry to lose their jobs. While the decline in coal industry employment is real, the role of administration policy is less certain. Experts note that competition from abundant, cheap natural gas has reduced the demand for coal more than any other factor. With less demand, the need for workers falls. …	TRUE	barely-true
531.json	George Bush, and a Republican Congress, have presided over a 55 percent increase in the size of domestic government spending in the last seven years.	Bush's budget request estimates nondefense domestic spending will total $2.32-trillion in 2008. That's precisely a 55 percent increase from the $1.49-trillion it totaled in 2000. Either way, Fiorina's point is generally backed up by the numbers. Domestic spending did surge during the Bush years, along with every other broad category of government outlays.	TRUE	TRUE
12087.json	Our campaign depends on small donations for the majority of our support.	Clinton said, "Our campaign depends on small donations for the majority of our support." https://www.sharethefacts.co/share/21481788-ce13-458b-a58f-b50a07734b1b	insufficent	insufficent
12798.json	Says Donald Trump and Mike Pence want to gamble with your retirement benefits in the stock market.	Reid said Pence and Trump "want to gamble with your retirement benefits in the stock market." Pence may have a record of supporting Republican proposals to change Social Security to allow for more investment into private funds, but Trump has clearly and repeatedly said this campaign cycle he has no plans to modify Social Security or introduce elements similar to the Bush’s failed 2005 attempt to …	TRUE	half-true
9316.json	Congress used earmarks for more than 200 years.	Reid said Congress has used earmarked spending for "more than 200 years." A credible case can be made that Congress engaged in something like earmarking as long ago as 1789 and 1817. The tactic wasn’t used extensively and consistently during that whole period, and it really exploded in the past 20 years, before being phased out more recently. Still, Reid has a point that legislators have long dir…	TRUE	TRUE
7135.json	If you and I fail to defund ObamaCare now, some 16,000 new IRS agents will be begin prying into our private medical records, eyeing each and every one of our treatments and prescriptions for violations.	"There are not going to be any discussions about health coverage with an IRS employee." "The role of the IRS is going to be, again, the tax portions of this," he said, "not the health portions of this." Our Ruling Dan Weber, president of the Association of Mature American Citizens, said in a widely circulated letter that under the federal health overhaul, 16,000 new IRS agents will be "prying int…	FALSE	pants-fire
7272.json	Social Security has nothing to do with the federal deficit.	But the program has run a deficit each year since then and is taking money from its bonds to cover the gap. Federal officials are also worried about the long-term impact of future deficits on the program. Johnson has a reasonable argument since Social Security is taking money from its bond interest to pay to cover the current gap. But these gaps do have an impact on other parts of the federal bud…
5230.json	Right now in Georgia, nearly one in three leaving our prisons are re-convicted within three years.	The Pew report on recidivism is more than one-third, which helps any argument that Deal would make that his statement is correct. The most recent state data shows the recidivism rate is slightly less than one-third. The governor said in his speech that the rate was "nearly" one in three. We believe all of the numbers we saw support his statement.	TRUE	mostly-true
12179.json	Evidence shows Zika virus turns fetus brains to liquid.	The Weekly Observer and other websites said that researchers had found that the Zika virus turned a fetal brain into liquid. The Observer referred to a study in the New England Journal of Medicine. They found signs of dead brain cells and cerebrospinal fluid where it shouldn’t be. They never said that the virus liquefied brain cells. Update (April 5, 2016): After we published, we heard from the s…	FALSE	FALSE
7111.json	Says the initial Portland plastic bag ban represented only a modest share of total single-use checkout bag use.	He said it was probably safe to say that the initial ordinance targeted "a third of the volume --- but again, I caution the numbers.") We understand that the mayor’s office may not have intended to mean plastic bag usage, but it read that way to us -- and likely many others. Words matter.
9524.json	When asked by a reporter whether hes at the center of a criminal scheme to violate campaign laws, Gov. Scott Walker nodded yes.	A Democratic Party web video making the rounds on social media shows a grim-faced Gov. Scott Walker appearing to bob his head yes to a reporter’s question about whether he was at the center of a "criminal scheme" to evade campaign finance laws.	TRUE	half-true
5403.json	Other states have considered or have sunset advisory commissions; the federal government has the ability, too.	The ability to review specific spending every few years isn’t the same thing as a broad-based commission with the power to kill agencies. Starr acknowledged as much in an interview with PolitiFact Oregon. His language on the floor was a little foggy and he clarified his comments in an interview. We don’t find this to be a significant piece of missing information, but feel readers should know the …	FALSE	FALSE
2491.json	Pepper ... kicked off a jock tax, imposing a levy on the sports and entertainment industry.	The story did not mention Pepper or the city of Cincinnati. However, Pepper’s legislation, while beneficial to the city budget, did institute the tax collection in Cincinnati. And the experts we talked to said collecting the tax was the city’s prerogative. Pepper can’t duck responsibility for starting the tax in Cincinnati.	TRUE	mostly-true
11562.json	The Trans-Pacific Partnership was designed for China to come in, as they always do, through the back door and totally take advantage of everyone.	Not only is China not a part of the TPP, but the experts we talked to all agreed: The TPP isn’t exciting news for China. There’s a chance that China could join the TPP down the line, but not without robust changes to its economy. Until then, China doesn’t stand to gain much from having trade diverted to other countries. Trump can’t blame everything on China.	FALSE	FALSE
10516.json	Austin has more lobbyists working for it than any other municipality in Texas.	Claunch said:"Austin has more lobbyists working for it than any other municipality in Texas." In 2014, indeed, Austin had more lobbyists (22) representing its interests before state government than any other Texas city and also was expected to spend more on such lobbyists than a few other cities identified as clients by multiple lobbyists. But lobbyist filings with the state don’t reveal how much…	TRUE	half-true
7195.json	Says Charlie Crist and Missouri Rep. Todd Akin hold same abortion views. No exception except the life of the mother.	In this case, Curry said, "Todd Akin & @charliecristfl hold same abortion views. No exception except the life of the mother." But even RPOF acknowledges that Crist's exceptions go beyond the life of the mother to include rape and incest. And RPOF ignores Crist’s words and actions that would conflict with Akin’s stances -- such as when Crist called himself "pro-choice."	FALSE	FALSE
2316.json	Florida is enjoying its lowest crime rate in 39 years.	Kenney said it's possible to argue that the auditing procedures today are better than in the past but still "yes they can cheat." He's right on the math that the state's crime rate in 2009 was lower than it was in 1971. But Crist omits that it had dropped below the 1971 rate before he became governor and that the rate went up his first two years in office.	TRUE	mostly-true
4289.json	Says of the 2,000 Portland households in the year-long (composting) pilot, 87 percent of participants reported being satisfied with the overall system.	But "if I were the client looking at this, I would look at the positive number I got back with squinty eyes. So where does all this leave us? Well, we’re not sold that the satisfaction rate is as high as 87 percent, given the survey design and the way the sample was collected. But, it does seem obvious that, among the pilot homes, the program is relatively popular.	TRUE	barely-true
63.json	We're spending $1.6 billion for all of Latin America in terms of aid and assistance, a fraction of what we're spending in Iraq, the $500 billion we've spent there	The amount he refers to is what has been requested by the administration for the upcoming fiscal year, subject to adjustments by Congress. Estimates vary on the precise amount spent since the 2003 invasion, but two of the most credible sources, the Congressional Research Service and the Congressional Budget Office, give the total as approximately $450 billion and $413 billion, respectively. Thus,…	TRUE	mostly-true
